# Supplementary material for: Design, Synthesis, and Antifungal Activity of N-(alkoxy)-Diphenyl Ether Carboxamide Derivates as Novel Succinate Dehydrogenase Inhibitors
Source: MDPI journal article supplement (doi:10.3390/molecules29010083), 2023-12-22
Supplement: s1 [file s1]

# Design, Synthesis, and Antifungal Activity of *N*-(alkoxy)-Diphenyl Ether Carboxamide Derivates as Novel Succinate Dehydrogenase Inhibitors

Bo He <sup>1,2</sup>, Yanhao Hu <sup>1,2</sup>, Wang Chen <sup>1,2</sup>, Xu He <sup>1,2</sup>, Enpei Zhang <sup>1,2</sup>, Mengxu Hu <sup>1,2</sup>, Pu Zhang <sup>3</sup>, Wei Yan <sup>1,2</sup> and Yonghao Ye <sup>1,2,\*</sup>

- <sup>1</sup> State & Local Joint Engineering Research Center of Green Pesticide Invention and Application,  
College of Plant Protection, Nanjing Agricultural University, Nanjing 210095, China;  
hebo@njau.edu.cn (B.H.); huyh@stu.njau.edu.cn (Y.H.);  
2022102110@stu.njau.edu.cn (W.C.); 2022102112@stu.njau.edu.cn (X.H.);  
12121413@stu.njau.edu.cn (E.Z.);  
2021102127@stu.njau.edu.cn (M.H.); yanwei@njau.edu.cn (W.Y.)
- <sup>2</sup> Key Laboratory of Integrated Management of Crop Diseases and Pests,  
Ministry of Education,  
Nanjing 210095, China
- <sup>3</sup> Research & Development Center, Jiangsu Flag Chemical Industry Co., Ltd.,  
Nanjing 210095, China; zhangpu@flagchem.com
- \* Correspondence: yeyh@njau.edu.cn

## S1. Structural characterization data of target compounds M1-M18

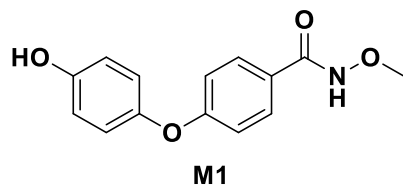

4-(4-hydroxyphenoxy)-N-methoxybenzamide (**M1**); Yield: 73% (189.1 mg); White solid;  $^1\text{H}$  NMR (500 MHz,  $\text{DMSO-}d_6$ )  $\delta$  11.66 (s, 1H), 9.48 (s, 1H), 7.73 (d,  $J = 8.5$  Hz, 2H), 6.98 – 6.89 (m, 4H), 6.81 (d,  $J = 8.0$  Hz, 2H), 3.68 (s, 3H).;  $^{13}\text{C}$  NMR (125 MHz,  $\text{DMSO-}d_6$ )  $\delta$  164.09, 161.82, 154.98, 147.28, 129.64, 126.31, 122.12, 116.94, 116.54, 63.78.; ESI-HRMS:  $m/z$   $[\text{M}+\text{H}]^+$  calcd. for  $[\text{C}_{14}\text{H}_{13}\text{NO}_4\text{H}]$ : 260.0917. Found: 260.0918.

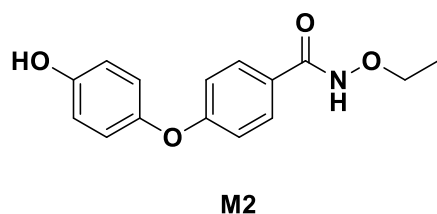

N-ethoxy-4-(4-hydroxyphenoxy)benzamide (**M2**); Yield: 70% (191.2 mg); White solid;  $^1\text{H}$  NMR (500 MHz,  $\text{DMSO-}d_6$ )  $\delta$  11.48 (s, 1H), 9.42 (s, 1H), 7.69 – 6.73 (m, 2H), 6.90 – 6.83 (m, 4H), 6.79 – 6.73 (m, 2H), 3.89 – 3.81 (m, 2H), 1.50 (t,  $J = 3.0$ , 3H).;  $^{13}\text{C}$  NMR (125 MHz,  $\text{DMSO-}d_6$ )  $\delta$  164.21, 161.75, 154.96, 147.35, 129.66, 126.49, 122.07, 116.94, 116.56, 71.21, 14.07.; ESI-HRMS:  $m/z$   $[\text{M}+\text{Na}]^+$  calcd. for  $[\text{C}_{15}\text{H}_{15}\text{NO}_4\text{Na}]$ : 296.0893. Found: 296.0894.

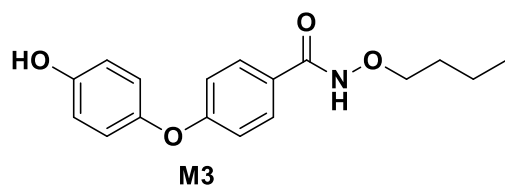

N-butoxy-4-(4-hydroxyphenoxy)benzamide (**M3**); Yield: 76% (228.9 mg); White solid;  $^1\text{H}$  NMR (500 MHz,  $\text{DMSO-}d_6$ )  $\delta$  11.49 (s, 1H), 9.46 (s, 1H), 7.73 (d,  $J = 8.5$  Hz, 2H), 6.92 (t,  $J = 9.0$  Hz, 4H), 6.81 (d,  $J = 8.5$  Hz, 2H), 3.86 (t,  $J = 6.5$  Hz, 2H), 1.61-1.53 (m, 2H), 1.45-1.35 (m, 2H), 0.91 (t,  $J = 7.0$  Hz, 3H).;  $^{13}\text{C}$  NMR (125 MHz,  $\text{DMSO-}d_6$ )  $\delta$  164.20, 161.74, 154.96, 147.35, 129.65, 126.52, 122.06, 116.93, 116.55, 75.43, 30.30, 19.22, 14.28.; ESI-HRMS:  $m/z$   $[\text{M}+\text{Na}]^+$  calcd. for  $[\text{C}_{17}\text{H}_{19}\text{NO}_4\text{Na}]$ : 324.1206. Found: 324.1207.

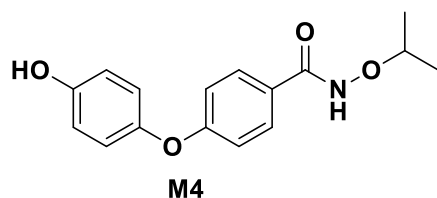

4-(4-hydroxyphenoxy)-N-isopropoxybenzamide (**M4**); Yield: 68% (195.2 mg); White solid;  $^1\text{H}$  NMR (500 MHz,  $\text{DMSO-}d_6$ )  $\delta$  11.35 (s, 1H), 9.43 (s, 1H), 7.74 (d,  $J = 9.0$  Hz, 2H), 6.97 – 6.88 (m, 4H), 6.81 (d,  $J = 9.0$  Hz, 2H), 4.14-4.06 (m, 1H), 1.19 (d,  $J = 6.5$  Hz, 6H).;  $^{13}\text{C}$  NMR (125 MHz,  $\text{DMSO-}d_6$ )  $\delta$  164.45, 161.67, 154.94, 147.39, 129.70, 126.69, 122.04, 116.93, 116.56, 76.98, 21.20.; ESI-HRMS:  $m/z$   $[\text{M}+\text{Na}]^+$  calcd. for  $[\text{C}_{16}\text{H}_{17}\text{NO}_4\text{Na}]$ : 310.1050. Found: 310.1051.

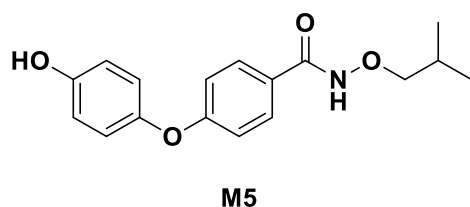

4-(4-hydroxyphenoxy)-N-isobutoxybenzamide (**M5**); Yield: 69% (207.8 mg); White solid;  $^1\text{H}$  NMR (500 MHz,  $\text{DMSO-}d_6$ )  $\delta$  11.49 (s, 1H), 9.41 (s, 1H), 7.71 – 7.65 (m, 2H), 6.93 – 6.85 (m, 4H), 6.81 – 6.74 (m, 2H), 3.60 (dd,  $J = 6.5$ ,

4.0 Hz, 2H), 1.91 – 1.85 (m, 1H), 0.89 (dd,  $J = 6.5, 4.0$  Hz, 6H).;  $^{13}\text{C}$  NMR (125 MHz,  $\text{DMSO-}d_6$ )  $\delta$  164.16, 161.73, 154.95, 147.35, 129.65, 126.53, 122.06, 116.93, 116.55, 82.22, 27.40, 19.67.; ESI-HRMS:  $m/z$   $[\text{M}+\text{Na}]^+$  calcd. for  $[\text{C}_{17}\text{H}_{19}\text{NO}_4\text{Na}]$ : 324.1206. Found: 324.1206.

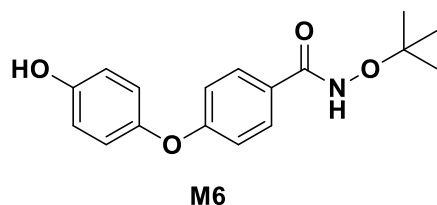

N-(tert-butoxy)-4-(4-hydroxyphenoxy)benzamide (**M6**); Yield: 64% (192.7 mg); White solid;  $^1\text{H}$  NMR (500 MHz,  $\text{DMSO-}d_6$ )  $\delta$  10.83 (s, 1H), 9.43 (s, 1H), 7.75 (d,  $J = 9.0$  Hz, 2H), 6.92 (dd,  $J = 8.5, 6.0$  Hz, 4H), 6.81 (d,  $J = 9.0$  Hz, 2H), 1.22 (s, 9H).;  $^{13}\text{C}$  NMR (125 MHz,  $\text{DMSO-}d_6$ )  $\delta$  166.02, 161.61, 154.90, 147.46, 129.86, 127.03, 121.98, 116.92, 116.56, 81.33, 27.03.; ESI-HRMS:  $m/z$   $[\text{M}+\text{Na}]^+$  calcd. for  $[\text{C}_{17}\text{H}_{19}\text{NO}_4\text{Na}]$ : 324.1206. Found: 324.1205.

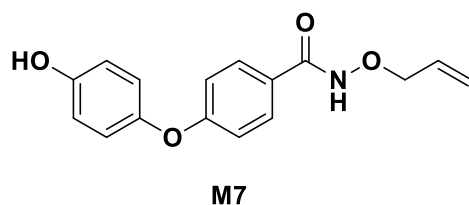

N-(allyloxy)-4-(4-hydroxyphenoxy)benzamide (**M7**); Yield: 63% (179.6 mg); White solid;  $^1\text{H}$  NMR (500 MHz,  $\text{DMSO-}d_6$ )  $\delta$  11.58 (s, 1H), 9.46 (s, 1H), 7.72 (d,  $J = 8.5$  Hz, 2H), 6.97 – 6.89 (m, 4H), 6.83 – 6.79 (m, 2H), 6.03 – 5.94 (m, 1H), 5.37 – 5.23 (m, 2H), 4.39 (d,  $J = 6.0$  Hz, 2H).;  $^{13}\text{C}$  NMR (125 MHz,  $\text{DMSO-}d_6$ )  $\delta$  164.33, 161.79, 154.96, 147.33, 133.75, 129.66, 126.38, 122.07,

119.74, 116.93, 116.57, 76.55.; ESI-HRMS:  $m/z$   $[M+Na]^+$  calcd. for  $[C_{16}H_{15}NO_4Na]$ : 308.0893. Found: 308.0895.

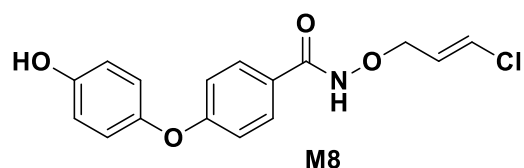

(E)-N-((3-chloroallyl)oxy)-4-(4-hydroxyphenoxy)benzamide (**M8**); Yield: 59% (18.2 mg); White solid;  $^1H$  NMR (500 MHz,  $DMSO-d_6$ )  $\delta$  11.62 (s, 1H), 9.46 (s, 1H), 7.72 (d,  $J$  = 8.5 Hz, 2H), 6.93 (dd,  $J$  = 9.0, 7.5 Hz, 4H), 6.81 (d,  $J$  = 9.0 Hz, 2H), 6.64 (d,  $J$  = 13.5 Hz, 1H), 6.16 (dt,  $J$  = 13.5, 7.0 Hz, 1H), 4.40 (dd,  $J$  = 7.0, 1.5 Hz, 2H).;  $^{13}C$  NMR (125 MHz,  $DMSO-d_6$ )  $\delta$  164.49, 161.87, 154.97, 147.31, 129.72, 129.49, 126.23, 123.56, 122.08, 116.94, 116.58, 73.46.; ESI-HRMS:  $m/z$   $[M+H]^+$  calcd. for  $[C_{16}H_{14}ClNO_4H]$ : 320.0684. Found: 320.0681.

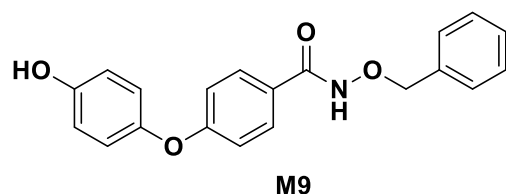

N-(benzyloxy)-4-(4-hydroxyphenoxy)benzamide (**M9**); Yield: 80% (268.1 mg); Yellow solid;  $^1H$  NMR (500 MHz,  $DMSO-d_6$ )  $\delta$  11.69 (s, 1H), 9.47 (s, 1H), 7.74 (dd,  $J$  = 8.5, 3.5 Hz, 2H), 7.50 – 7.35 (m, 5H), 6.96 – 6.91 (m, 4H), 6.84 – 6.81 (m, 2H), 4.91 (s, 2H).;  $^{13}C$  NMR (125 MHz,  $DMSO-d_6$ )  $\delta$  164.48, 161.84, 154.98, 147.34, 136.51, 129.72, 129.45, 128.86, 128.83, 126.40, 122.09, 116.95, 116.58, 77.53.; ESI-HRMS:  $m/z$   $[M+Na]^+$  calcd. for  $[C_{20}H_{17}NO_4Na]$ : 358.1050. Found: 358.1053.

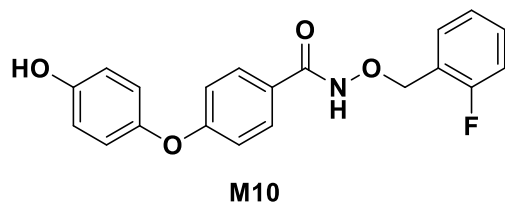

N-((2-fluorobenzyl)oxy)-4-(4-hydroxyphenoxy)benzamide (**M10**); Yield: 79% (27.8 mg); White solid;  $^1\text{H}$  NMR (500 MHz,  $\text{DMSO-}d_6$ )  $\delta$  11.67 (s, 1H), 9.46 (s, 1H), 7.71 (d,  $J$  = 8.5 Hz, 2H), 7.52 (t,  $J$  = 7.0 Hz, 1H), 7.44 (d,  $J$  = 7.0 Hz, 1H), 7.24 (t,  $J$  = 8.0 Hz, 2H), 6.96 – 6.89 (m, 4H), 6.81 (d,  $J$  = 8.0 Hz, 2H), 4.97 (s, 2H).;  $^{13}\text{C}$  NMR (125 MHz,  $\text{DMSO-}d_6$ )  $\delta$  164.51, 162.39, 161.84, 160.42, 154.98, 147.30, 132.65, 132.62, 131.42, 131.36, 129.71, 126.31, 124.94, 123.45, 123.33, 122.10, 116.94, 116.54, 115.96, 115.79, 70.82.; ESI-HRMS:  $m/z$   $[\text{M}+\text{Na}]^+$  calcd. for  $[\text{C}_{20}\text{H}_{16}\text{FNO}_4\text{Na}]$ : 376.0956. Found: 376.0957.

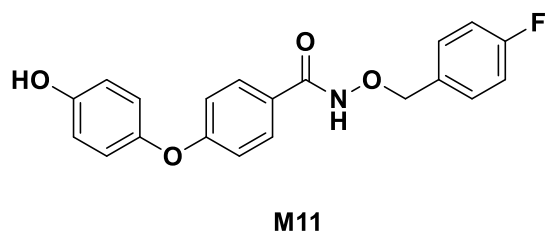

N-((4-fluorobenzyl)oxy)-4-(4-hydroxyphenoxy)benzamide (**M11**); Yield: 73% (25.8 mg); White solid;  $^1\text{H}$  NMR (500 MHz,  $\text{DMSO-}d_6$ )  $\delta$  11.67 (s, 1H), 9.48 (s, 1H), 7.73 (d,  $J$  = 8.5 Hz, 2H), 7.50 (dd,  $J$  = 8.5, 5.5 Hz, 2H), 7.22 (t,  $J$  = 9.0 Hz, 2H), 6.96 – 6.90 (m, 4H), 6.84 – 6.80 (m, 2H), 4.89 (s, 2H).;  $^{13}\text{C}$  NMR (125 MHz,  $\text{DMSO-}d_6$ )  $\delta$  164.48, 163.59, 162.85, 161.83, 154.98, 147.32, 132.85, 131.75, 131.68, 129.70, 126.33, 122.08, 116.94, 116.57, 115.75, 115.58, 76.65.; ESI-HRMS:  $m/z$   $[\text{M}+\text{Na}]^+$  calcd. for  $[\text{C}_{20}\text{H}_{16}\text{FNO}_4\text{Na}]$ : 376.0956. Found: 376.0957.

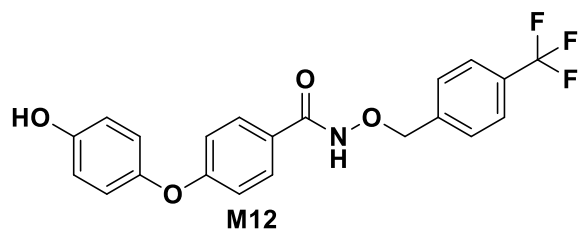

4-(4-hydroxyphenoxy)-N-((4-(trifluoromethyl)benzyl)oxy)benzamide (**M12**); Yield: 65% (262.0 mg); White solid;  $^1\text{H}$  NMR (500 MHz,  $\text{DMSO-}d_6$ )  $\delta$  11.73 (s, 1H), 9.46 (s, 1H), 7.77 (d,  $J$  = 8.0 Hz, 2H), 7.74 – 7.66 (m, 4H), 6.97 – 6.88 (m, 4H), 6.81 (d,  $J$  = 7.0 Hz, 2H), 5.01 (s, 2H).;  $^{13}\text{C}$  NMR (125 MHz,  $\text{DMSO-}d_6$ )  $\delta$  164.67, 161.90, 154.98, 147.30, 141.42, 129.78, 129.73, 129.30, 129.14, 128.11, 126.18, 125.72, 123.77, 122.08, 116.94, 116.58, 76.56.; ESI-HRMS:  $m/z$   $[\text{M}+\text{Na}]^+$  calcd. for  $[\text{C}_{21}\text{H}_{16}\text{F}_3\text{NO}_4\text{Na}]$ : 426.0924. Found: 426.0922.

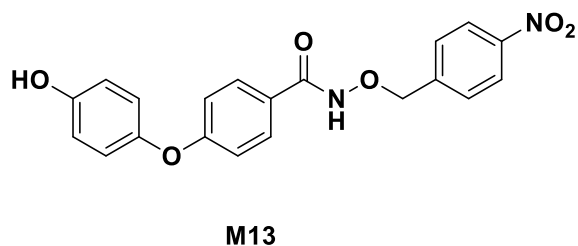

4-(4-hydroxyphenoxy)-N-((4-nitrobenzyl)oxy)benzamide (**M13**); Yield: 63% (239.5 mg); White solid;  $^1\text{H}$  NMR (500 MHz,  $\text{DMSO-}d_6$ )  $\delta$  11.79 (s, 1H), 9.47 (s, 1H), 8.30 – 8.22 (m, 2H), 7.73 (dd,  $J$  = 12.5, 8.5 Hz, 4H), 6.92 (dd,  $J$  = 8.5, 6.5 Hz, 4H), 6.81 (d,  $J$  = 6.5 Hz, 2H), 5.07 (s, 2H).;  $^{13}\text{C}$  NMR (125 MHz,  $\text{DMSO-}d_6$ )  $\delta$  164.69, 161.93, 154.98, 147.79, 147.28, 144.49, 129.99, 129.74, 126.10, 123.96, 122.07, 116.93, 116.59, 76.22.; ESI-HRMS:  $m/z$   $[\text{M}+\text{Na}]^+$  calcd. for  $[\text{C}_{20}\text{H}_{16}\text{N}_2\text{O}_6\text{Na}]$ : 403.0901. Found: 403.0902.

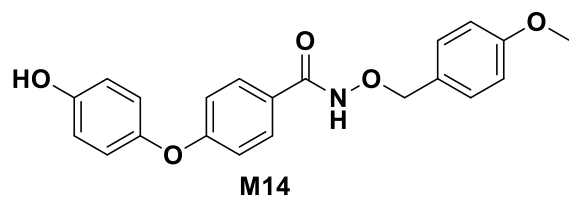

4-(4-hydroxyphenoxy)-N-((4-methoxybenzyl)oxy)benzamide (**M14**); Yield: 76% (277.5 mg); White solid;  $^1\text{H}$  NMR (500 MHz,  $\text{DMSO-}d_6$ )  $\delta$  11.59 (s, 1H), 9.44 (s, 1H), 7.72 (d,  $J = 9.5$  Hz, 2H), 7.36 (d,  $J = 8.0$  Hz, 2H), 6.97 – 6.89 (m, 6H), 6.81 (d,  $J = 9.0$  Hz, 2H), 4.82 (s, 2H), 3.76 (s, 3H).;  $^{13}\text{C}$  NMR (125 MHz,  $\text{DMSO-}d_6$ )  $\delta$  164.40, 161.79, 159.88, 154.96, 147.33, 131.26, 129.68, 128.43, 126.46, 122.09, 116.93, 116.55, 114.21, 77.16, 55.62.; ESI-HRMS:  $m/z$   $[\text{M}+\text{Na}]^+$  calcd. for  $[\text{C}_{21}\text{H}_{19}\text{NO}_5\text{Na}]$ : 388.1155. Found: 388.1154.

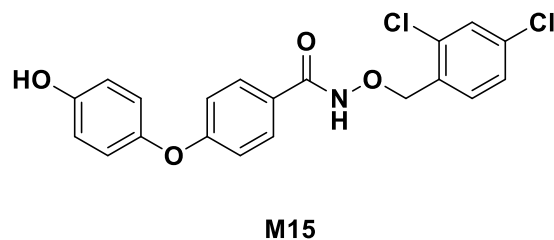

N-((2,4-dichlorobenzyl)oxy)-4-(4-hydroxyphenoxy)benzamide (**M15**); Yield: 78% (314.4 mg); Yellow oily liquid;  $^1\text{H}$  NMR (500 MHz,  $\text{DMSO-}d_6$ )  $\delta$  11.67 (s, 1H), 9.45 (s, 1H), 7.70 (d,  $J = 8.5$  Hz, 2H), 7.67 (d,  $J = 2.0$  Hz, 1H), 7.61 (d,  $J = 8.5$  Hz, 1H), 7.48 (dd,  $J = 8.0, 2.0$  Hz, 1H), 6.95 – 6.89 (m, 4H), 6.83 – 6.79 (m, 2H), 5.00 (s, 2H).;  $^{13}\text{C}$  NMR (125 MHz,  $\text{DMSO-}d_6$ )  $\delta$  164.67, 161.89, 154.99, 147.28, 134.81, 134.37, 133.37, 133.26, 129.76, 129.34, 127.97, 126.18, 122.10, 116.94, 116.54, 73.60.; ESI-HRMS:  $m/z$   $[\text{M}+\text{Na}]^+$  calcd. for  $[\text{C}_{20}\text{H}_{15}\text{Cl}_2\text{NO}_4\text{Na}]$ : 426.0270. Found: 426.0268.



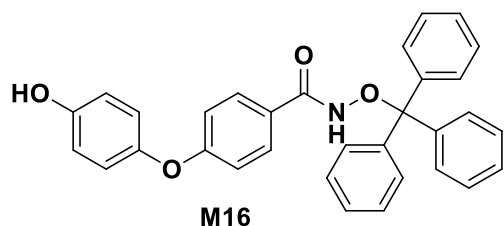

4-(4-hydroxyphenoxy)-N-(trityloxy)benzamide (**M16**); Yield: 84% (409.2 mg); White solid;  $^1\text{H}$  NMR (500 MHz,  $\text{DMSO-}d_6$ )  $\delta$  10.77 (s, 1H), 9.44 (s, 1H), 7.46 – 7.24 (m, 17H), 6.96 – 6.73 (m, 6H).;  $^{13}\text{C}$  NMR (125 MHz,  $\text{DMSO-}d_6$ )  $\delta$  166.66, 161.59, 154.90, 147.35, 143.09, 129.98, 129.65, 129.42, 128.02, 126.85, 122.01, 116.91, 116.29, 92.84.; ESI-HRMS:  $m/z$   $[\text{M}+\text{Na}]^+$  calcd. for  $[\text{C}_{32}\text{H}_{25}\text{NO}_4\text{Na}]$ : 510.1676. Found: 510.1677.

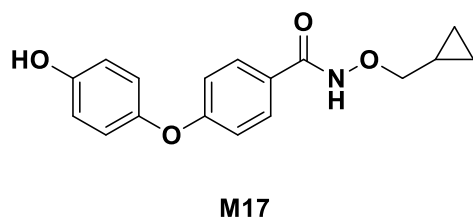

N-(cyclopropylmethoxy)-4-(4-hydroxyphenoxy)benzamide (**M17**); Yield: 81% (24.3 mg); White solid;  $^1\text{H}$  NMR (500 MHz,  $\text{DMSO-}d_6$ )  $\delta$  11.60 – 11.49 (m, 1H), 9.49 – 9.40 (m, 1H), 7.75 – 7.68 (m, 2H), 6.97 – 6.86 (m, 4H), 6.84 – 6.76 (m, 2H), 3.72 – 3.63 (m, 2H), 1.08 (s, 1H), 0.57 – 0.45 (m, 2H), 0.25 (d,  $J = 12.0, 6.9$  Hz, 2H).;  $^{13}\text{C}$  NMR (125 MHz,  $\text{DMSO-}d_6$ )  $\delta$  164.14, 161.72, 154.95, 147.34, 129.63, 126.56, 122.07, 116.93, 116.53, 80.21, 9.79, 3.53.; ESI-HRMS:  $m/z$   $[\text{M}+\text{Na}]^+$  calcd. for  $[\text{C}_{17}\text{H}_{17}\text{NO}_4\text{Na}]$ : 322.1050. Found: 322.1051.

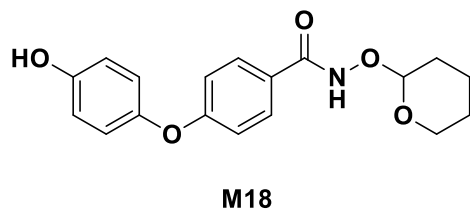

4-(4-hydroxyphenoxy)-N-((tetrahydro-2H-pyran-2-yl)oxy)benzamide (**M18**); Yield: 66% (217.2 mg); White solid;  $^1\text{H}$  NMR (500 MHz,  $\text{DMSO}-d_6$ )  $\delta$  11.55 (s, 1H), 9.46 (s, 1H), 7.75 (d,  $J = 7.0$  Hz, 2H), 6.94 (d,  $J = 6.4$  Hz, 4H), 6.81 (d,  $J = 6.7$  Hz, 2H), 4.97 (s, 1H), 4.05 (s, 1H), 3.51 (d,  $J = 11.4$  Hz, 1H), 1.71 (s, 3H), 1.54 (s, 3H).;  $^{13}\text{C}$  NMR (125 MHz,  $\text{DMSO}-d_6$ )  $\delta$  164.30, 161.76, 154.95, 147.37, 129.83, 126.42, 122.04, 116.93, 116.55, 101.52, 61.91, 28.43, 25.26, 18.86.; ESI-HRMS:  $m/z$   $[\text{M}+\text{Na}]^+$  calcd. for  $[\text{C}_{18}\text{H}_{19}\text{NO}_5\text{Na}]$ : 352.1155. Found: 352.1154.

## S2. Spectrums of the representative compounds M1-M18

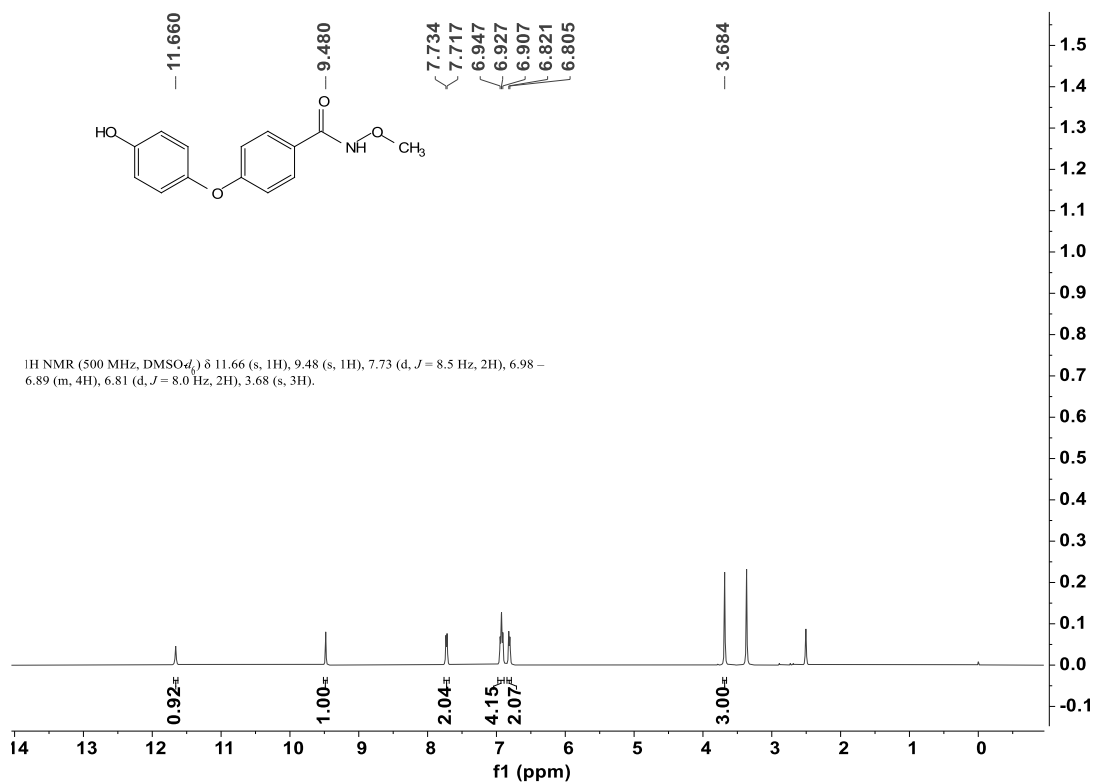

The  $^1\text{H}$  NMR spectrogram of compound **M1**

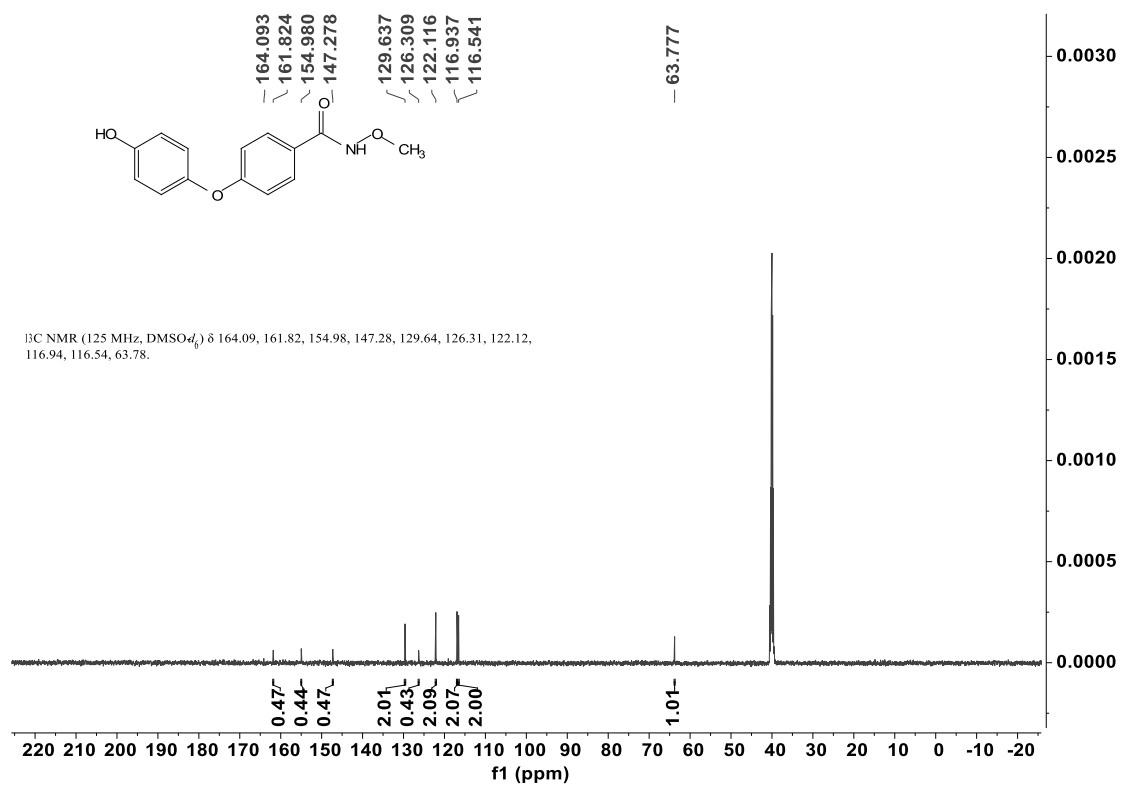

The  $^{13}\text{C}$  NMR spectrogram of compound **M1**

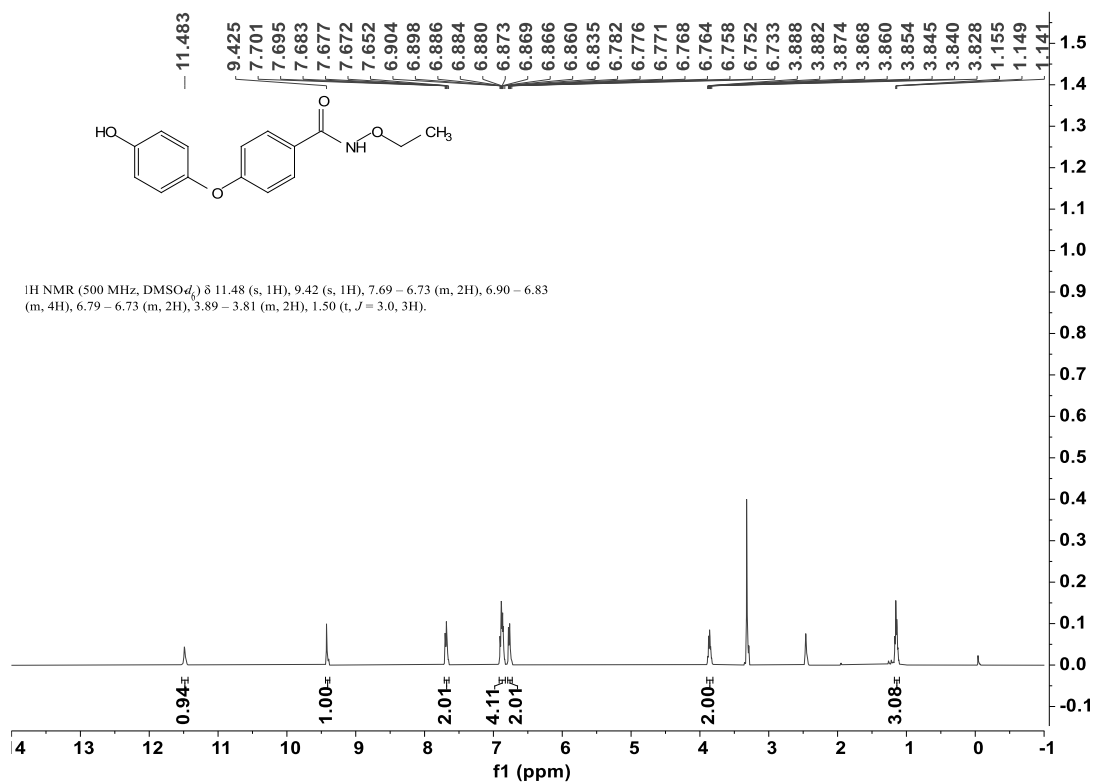

The  $^1\text{H NMR}$  spectrogram of compound M2

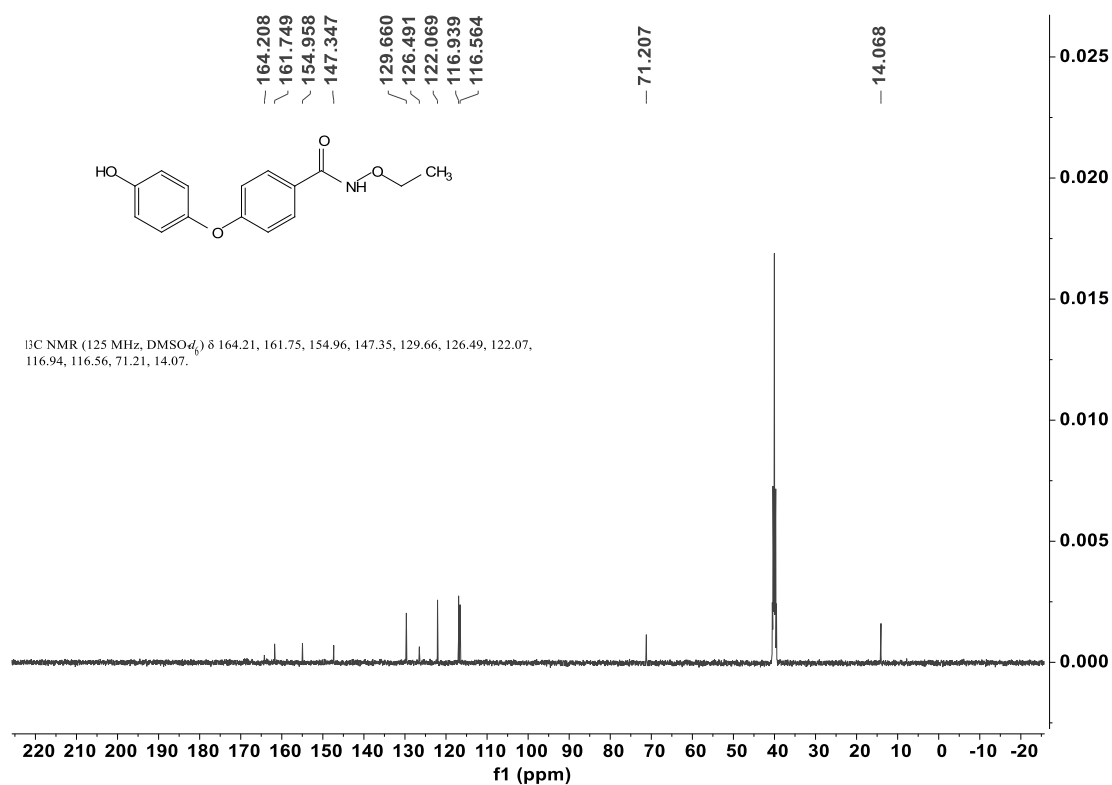

The  $^{13}\text{C NMR}$  spectrogram of compound M2

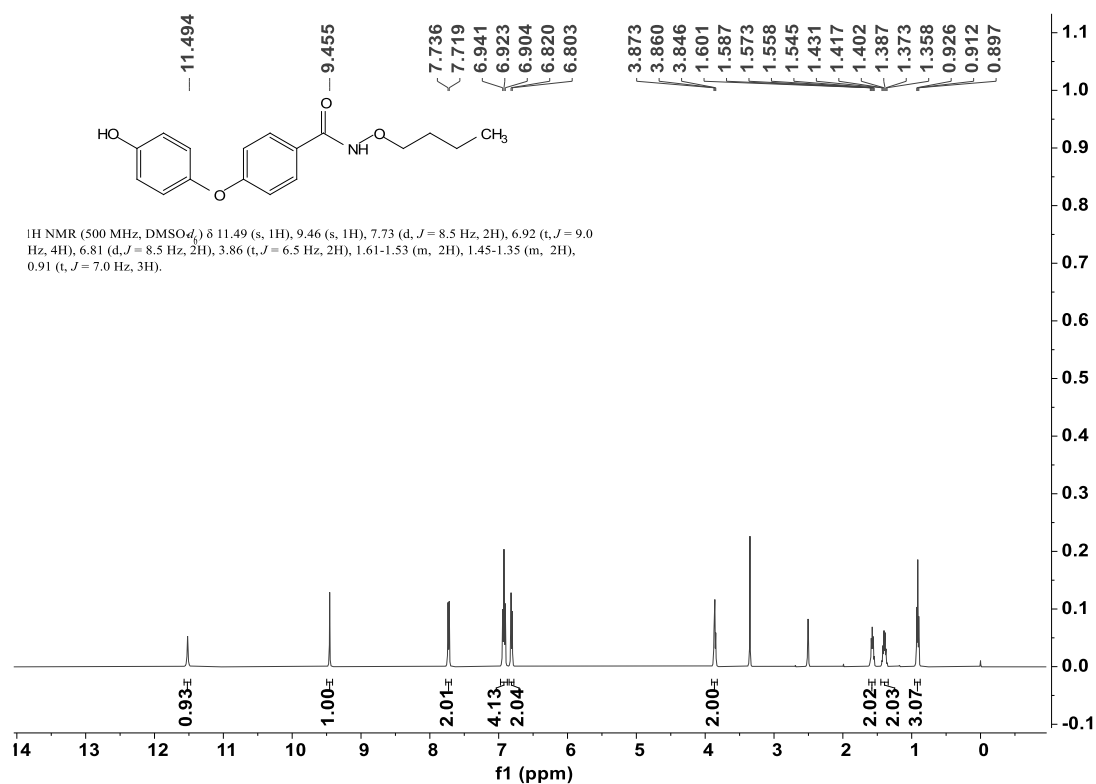

The  $^1\text{H}$  NMR spectrogram of compound **M3**

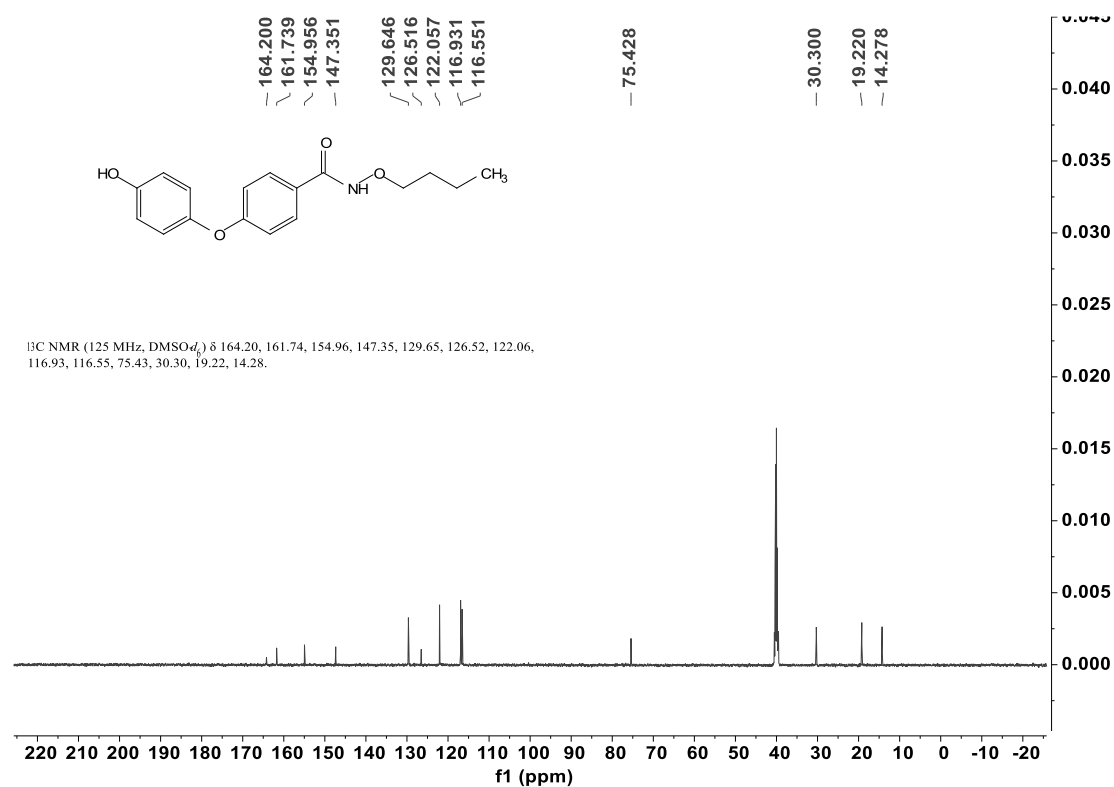

The  $^{13}\text{C}$  NMR spectrogram of compound **M3**

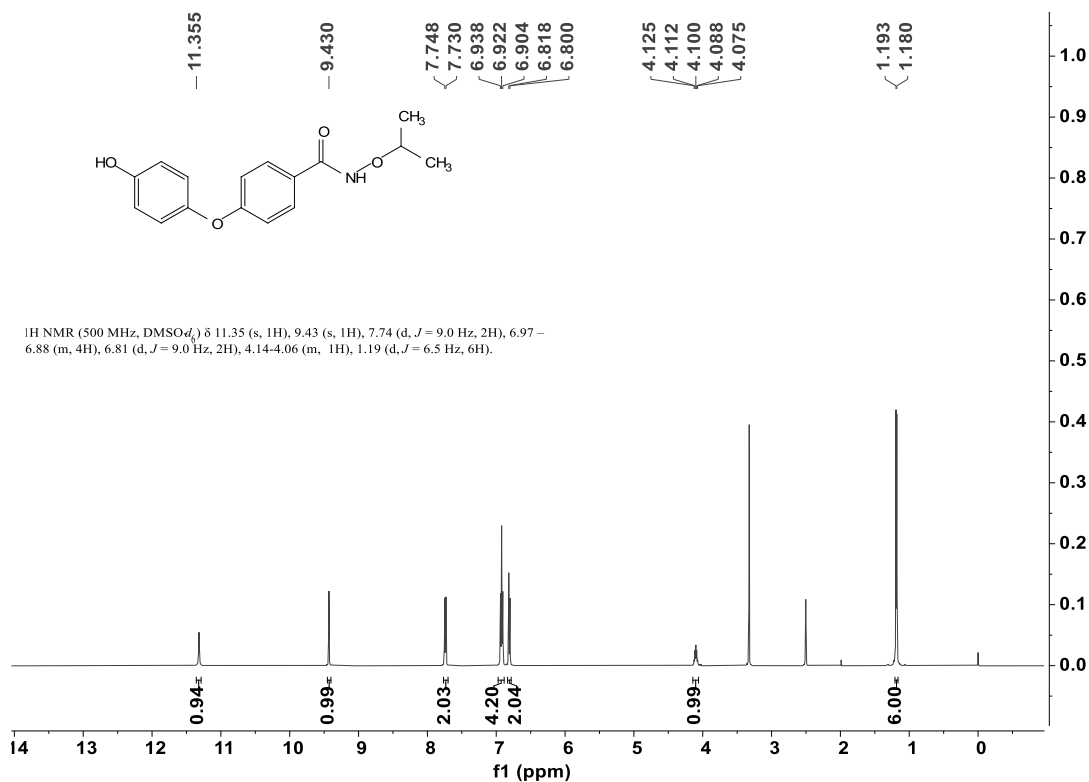

The  $^1\text{H}$  NMR spectrogram of compound **M4**

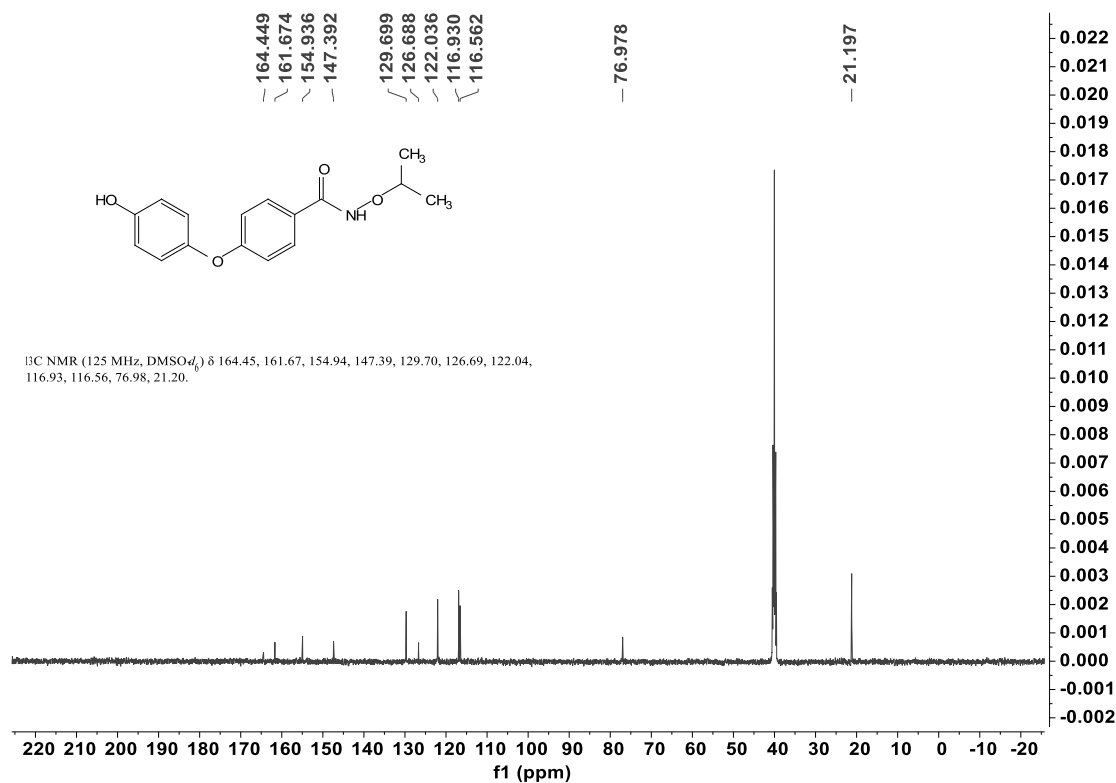

The  $^{13}\text{C}$  NMR spectrogram of compound **M4**

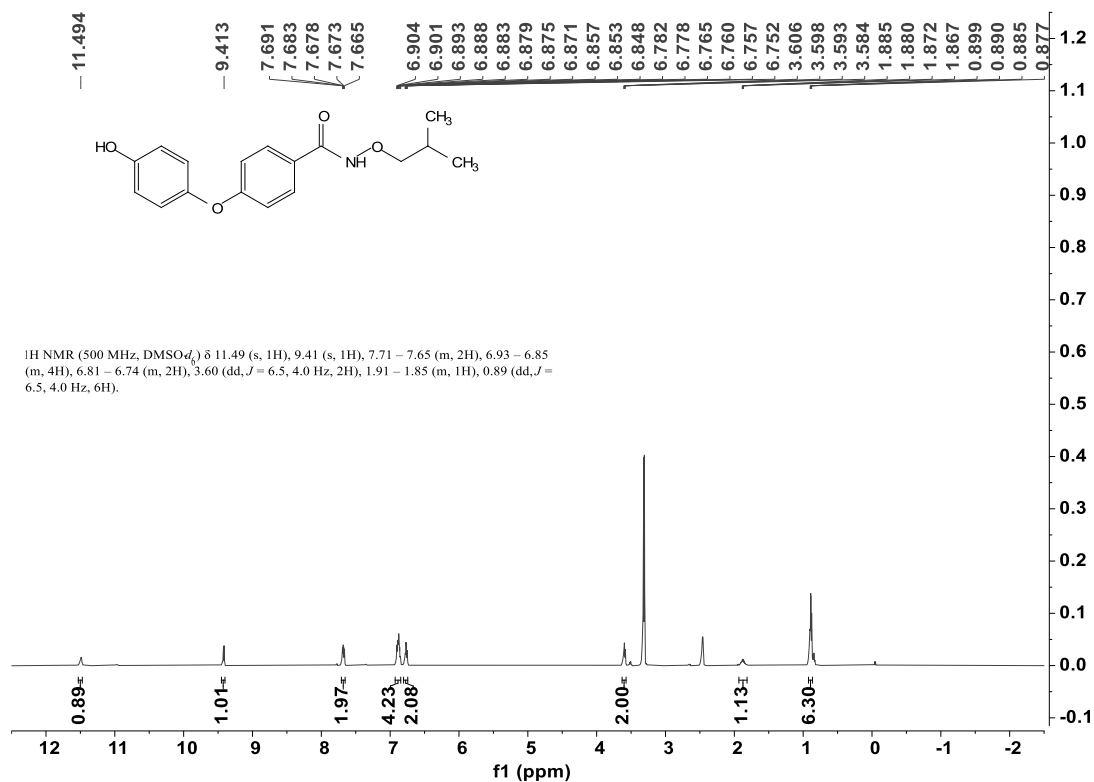

The <sup>1</sup>H NMR spectrogram of compound **M5**

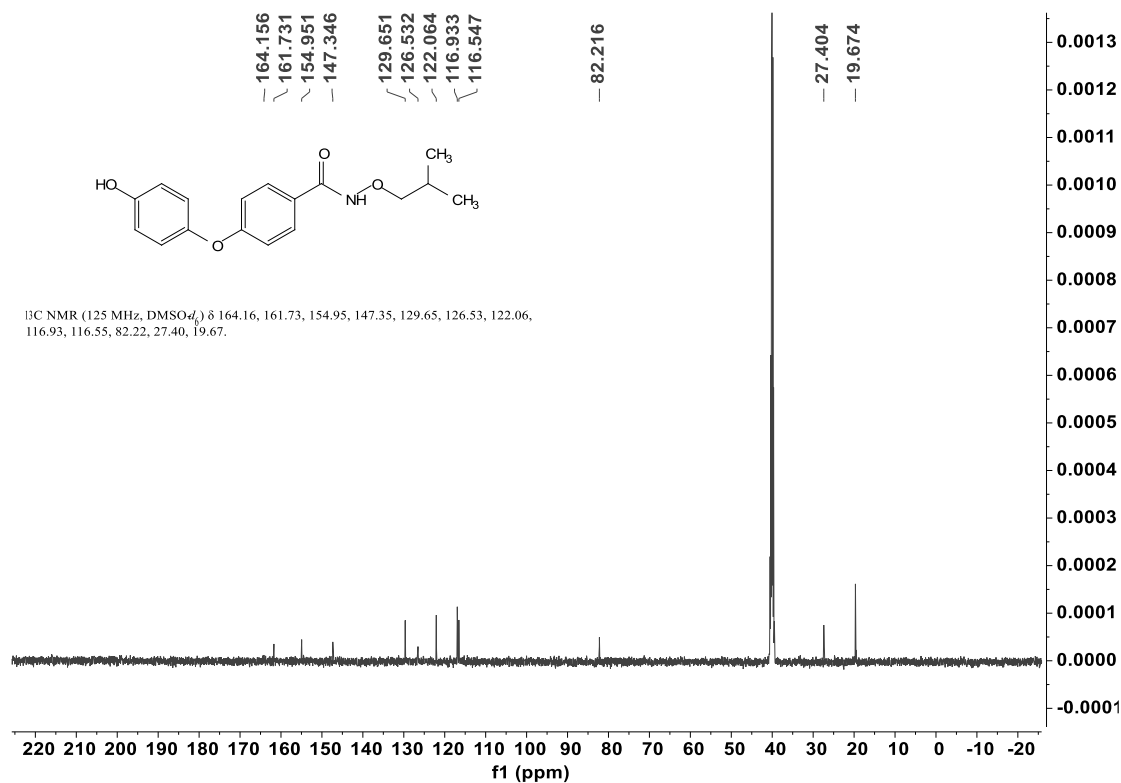

The <sup>13</sup>C NMR spectrogram of compound **M5**

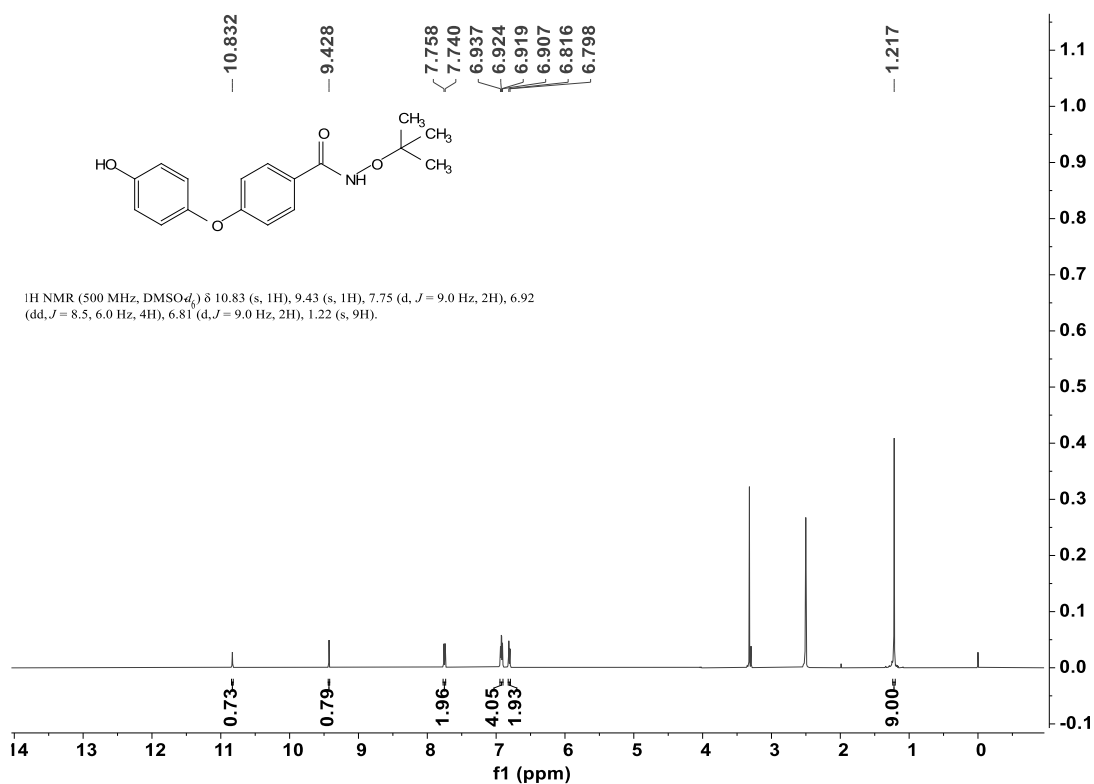

The  $^1\text{H}$  NMR spectrogram of compound **M6**

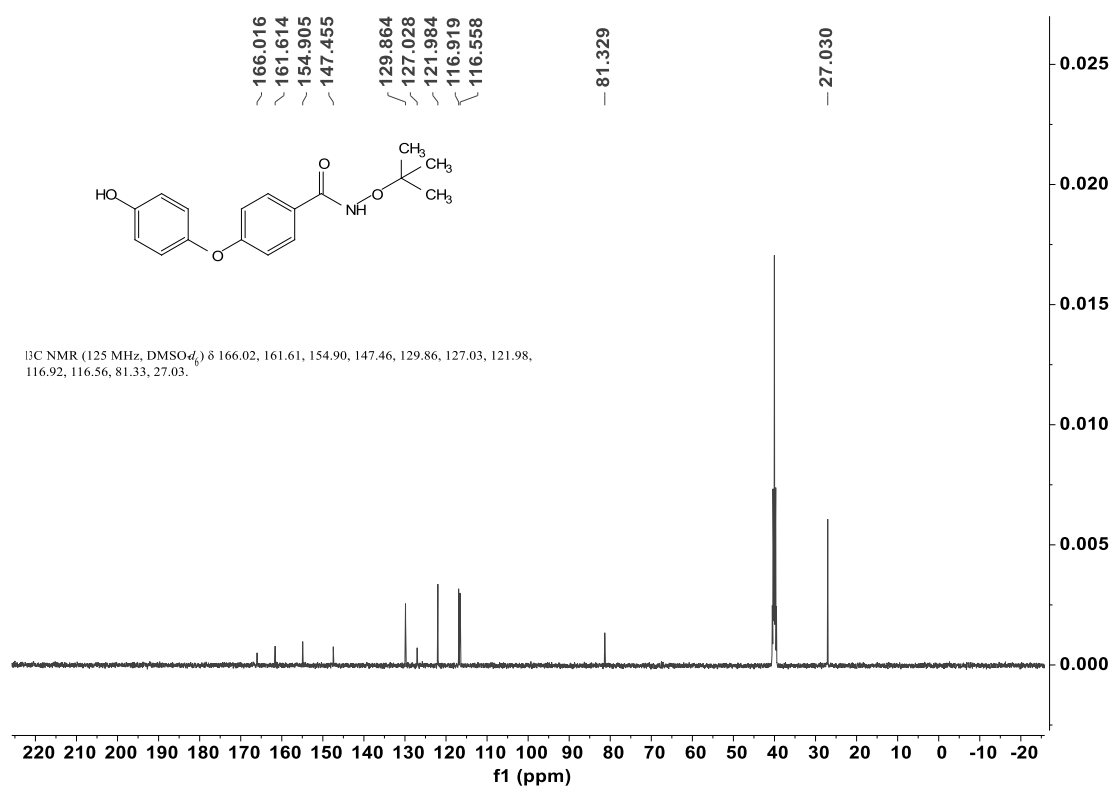

The  $^{13}\text{C}$  NMR spectrogram of compound **M6**



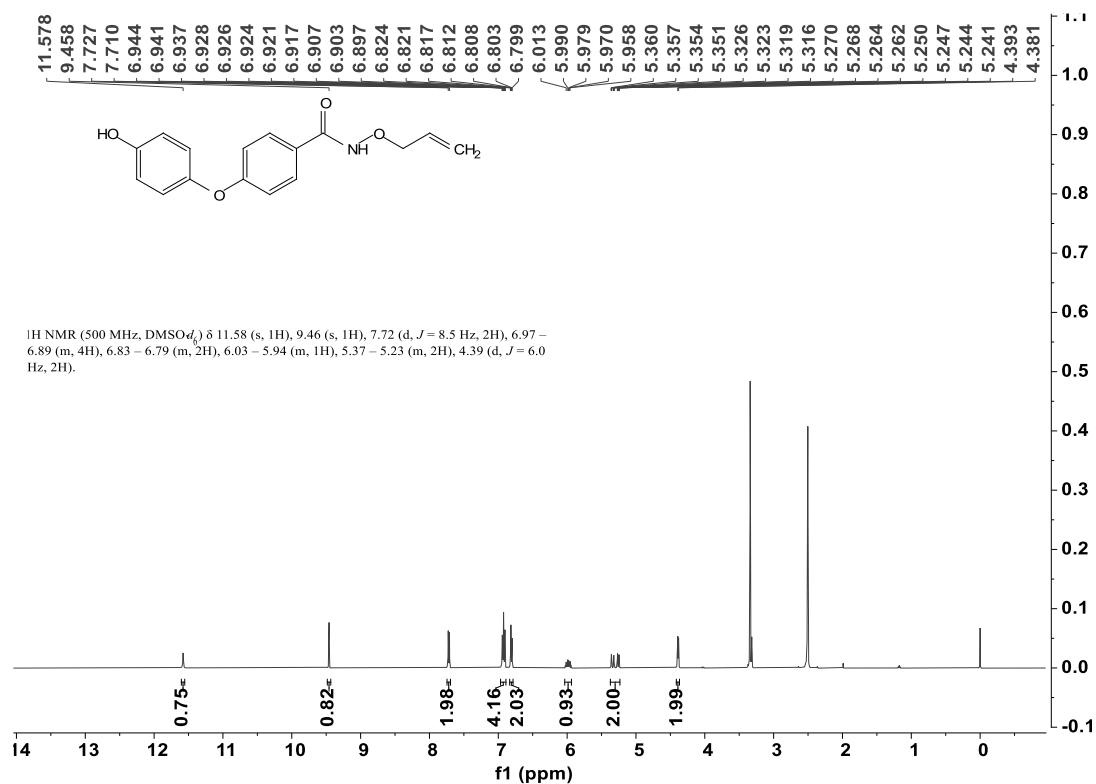

The <sup>1</sup>H NMR spectrogram of compound **M7**

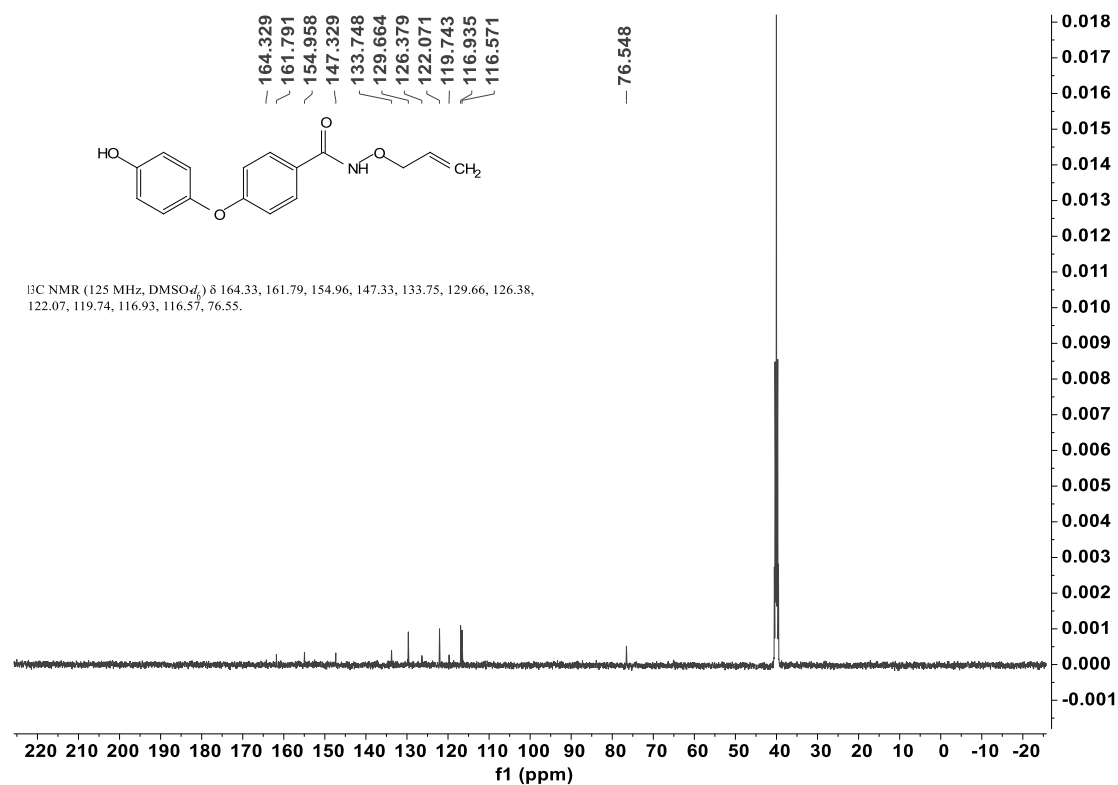

The <sup>13</sup>C NMR spectrogram of compound **M7**

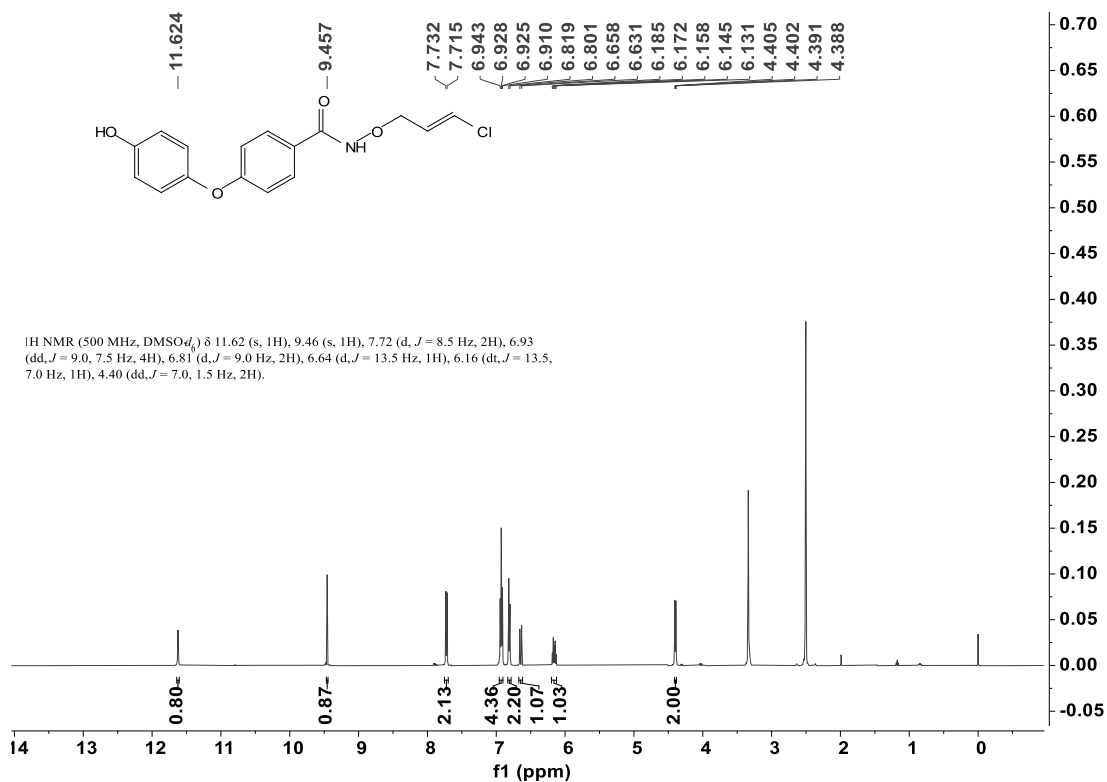

The <sup>1</sup>H NMR spectrogram of compound **M8**

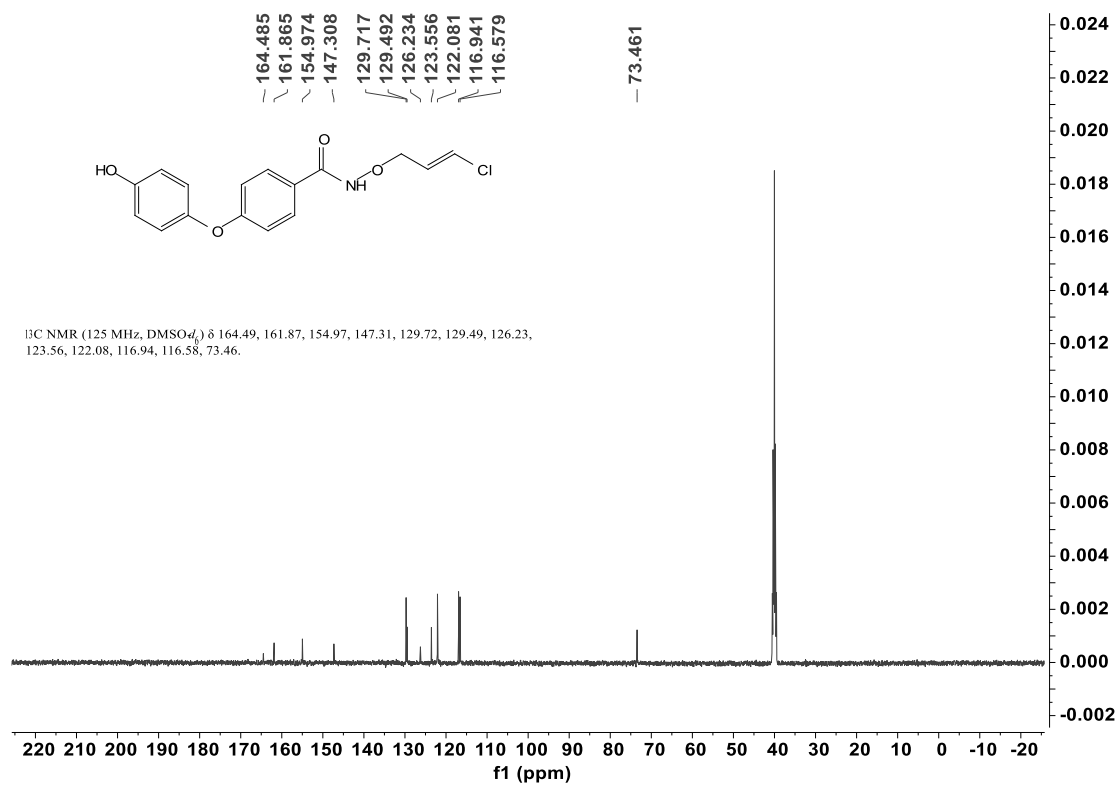

The <sup>13</sup>C NMR spectrogram of compound **M8**

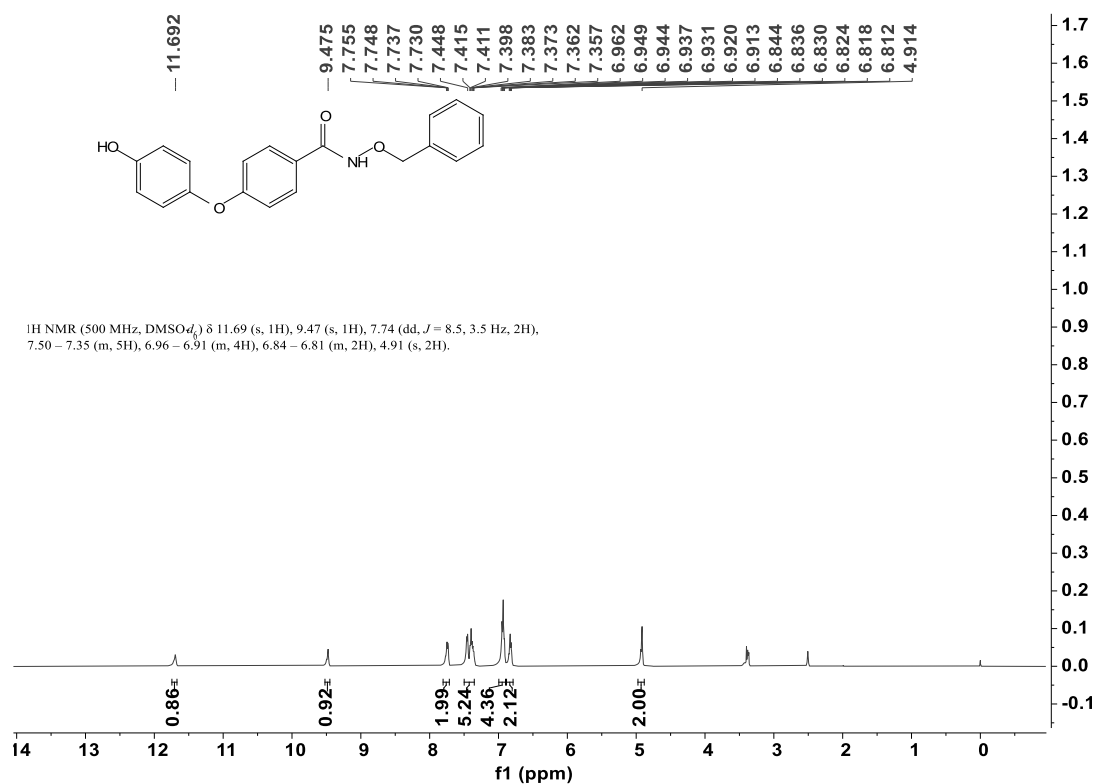

The <sup>1</sup>H NMR spectrogram of compound **M9**

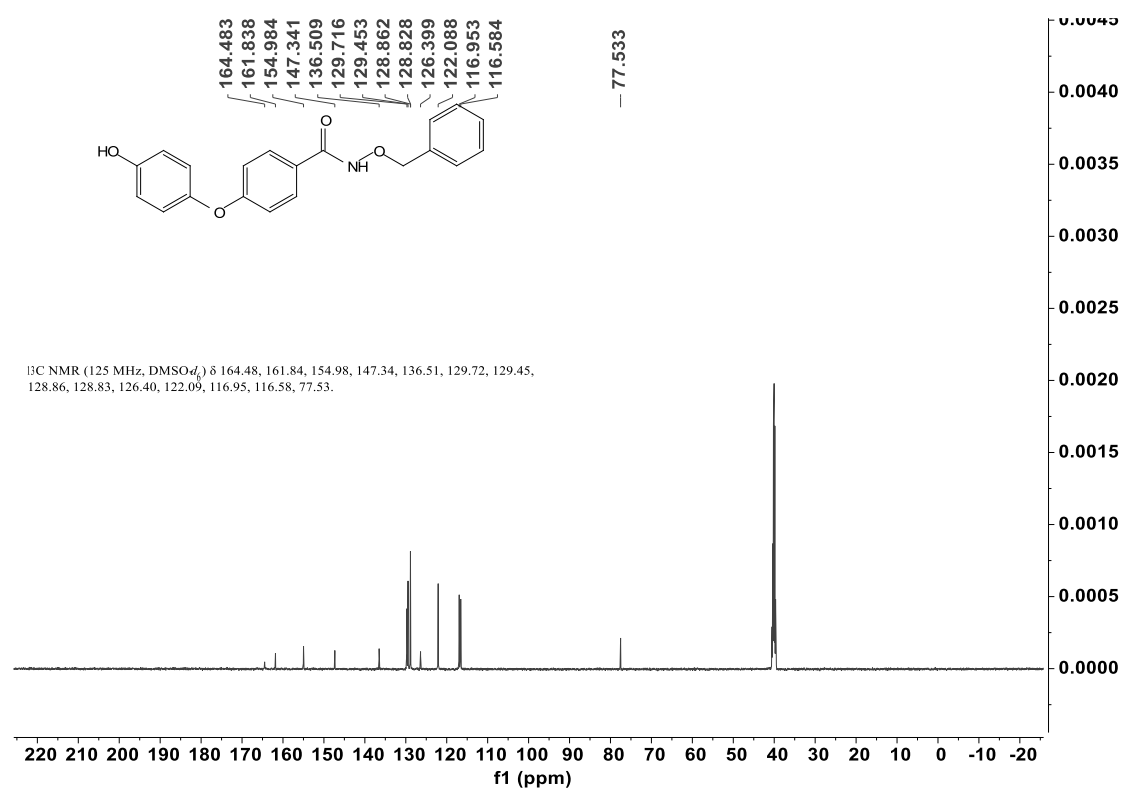

The <sup>13</sup>C NMR spectrogram of compound **M9**

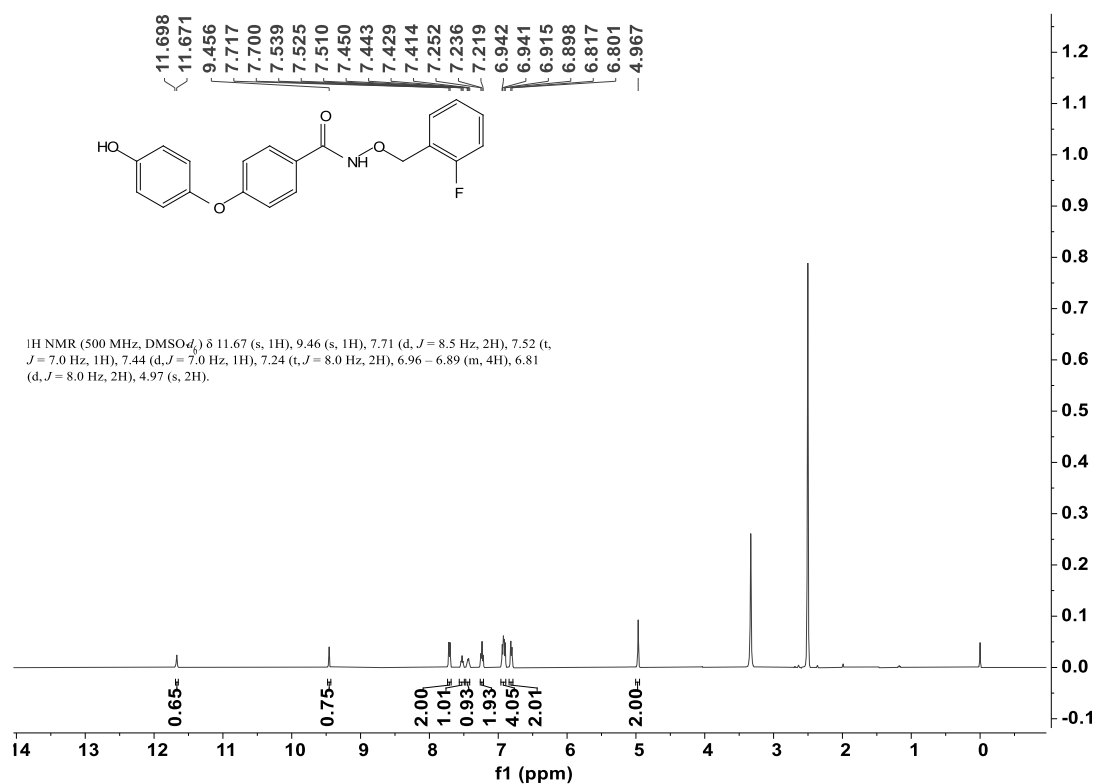

The  $^1\text{H}$  NMR spectrogram of compound **M10**

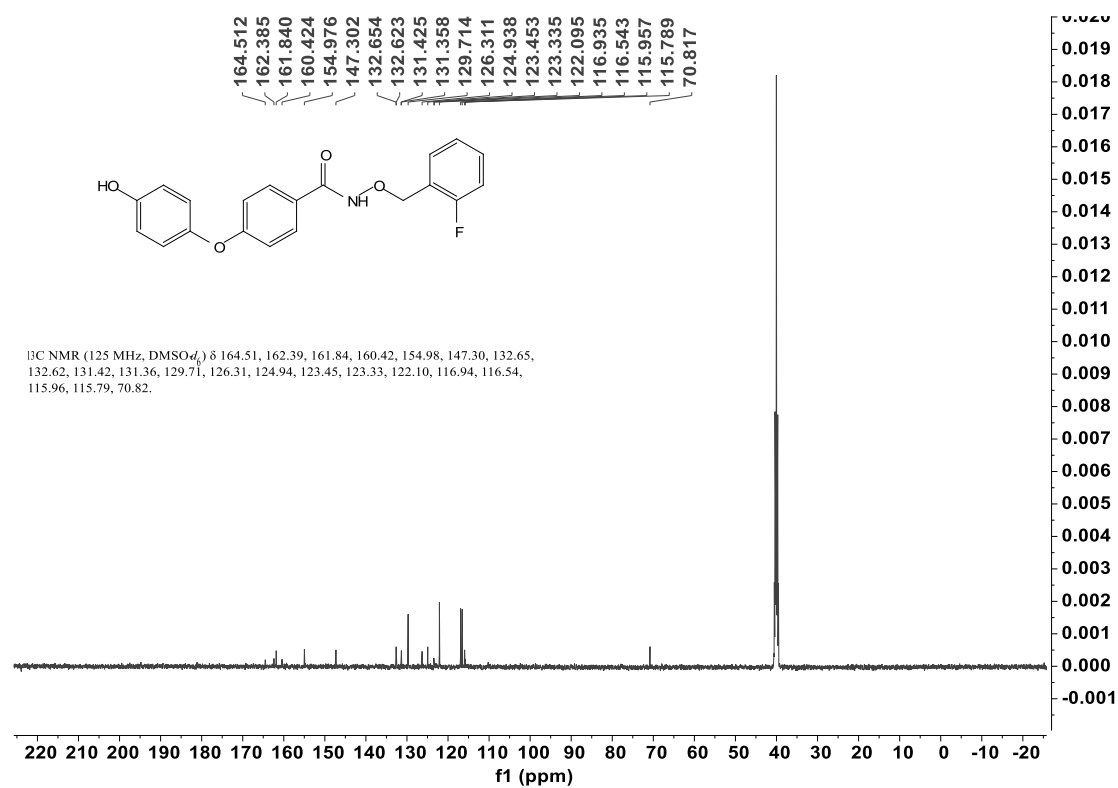

The  $^{13}\text{C}$  NMR spectrogram of compound **M10**

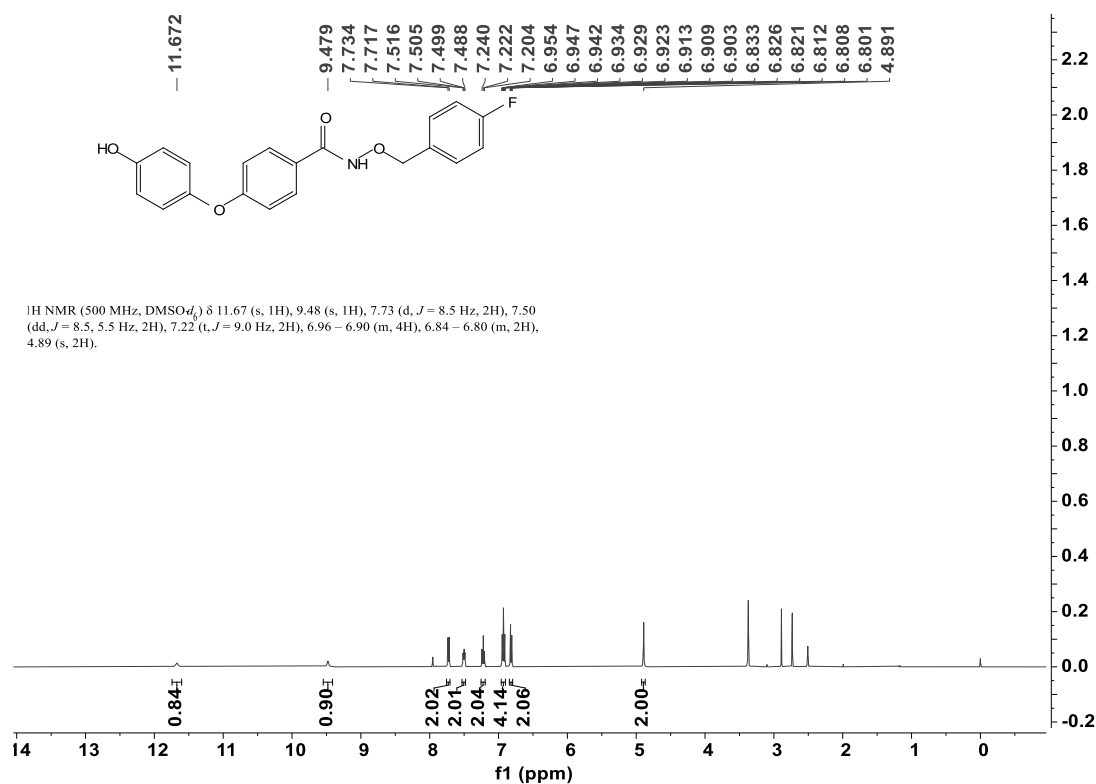

The <sup>1</sup>H NMR spectrogram of compound **M11**

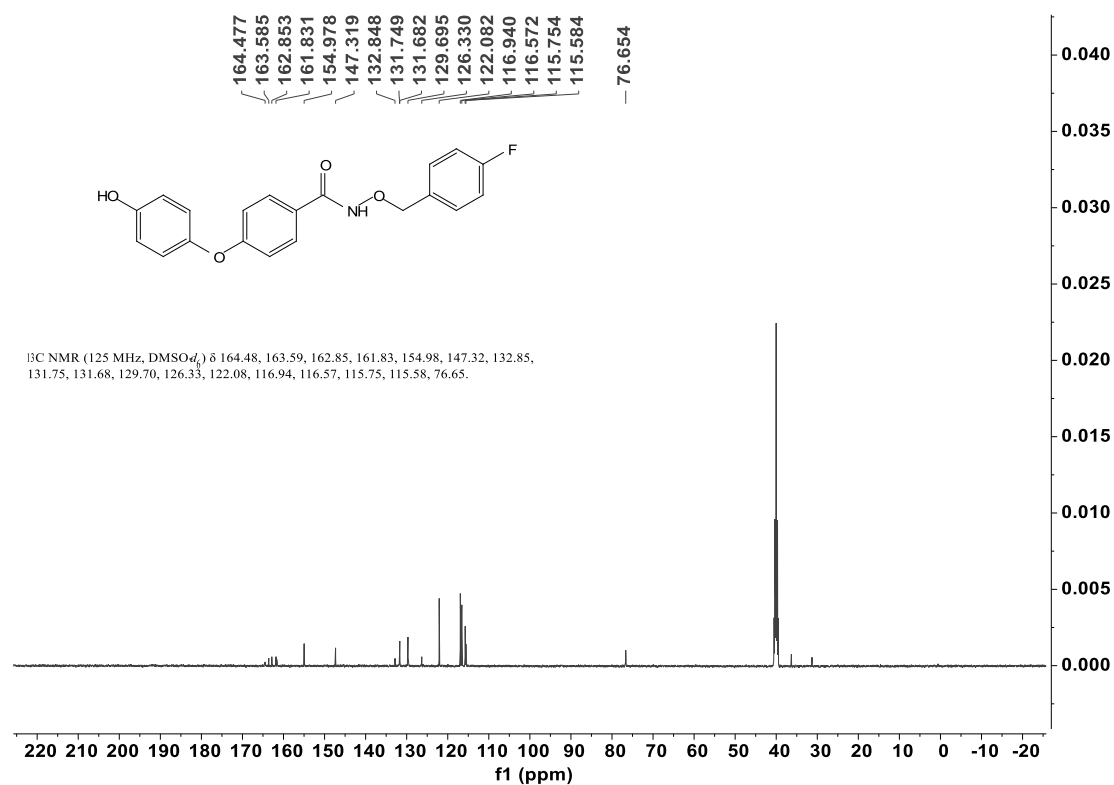

The <sup>13</sup>C NMR spectrogram of compound **M11**

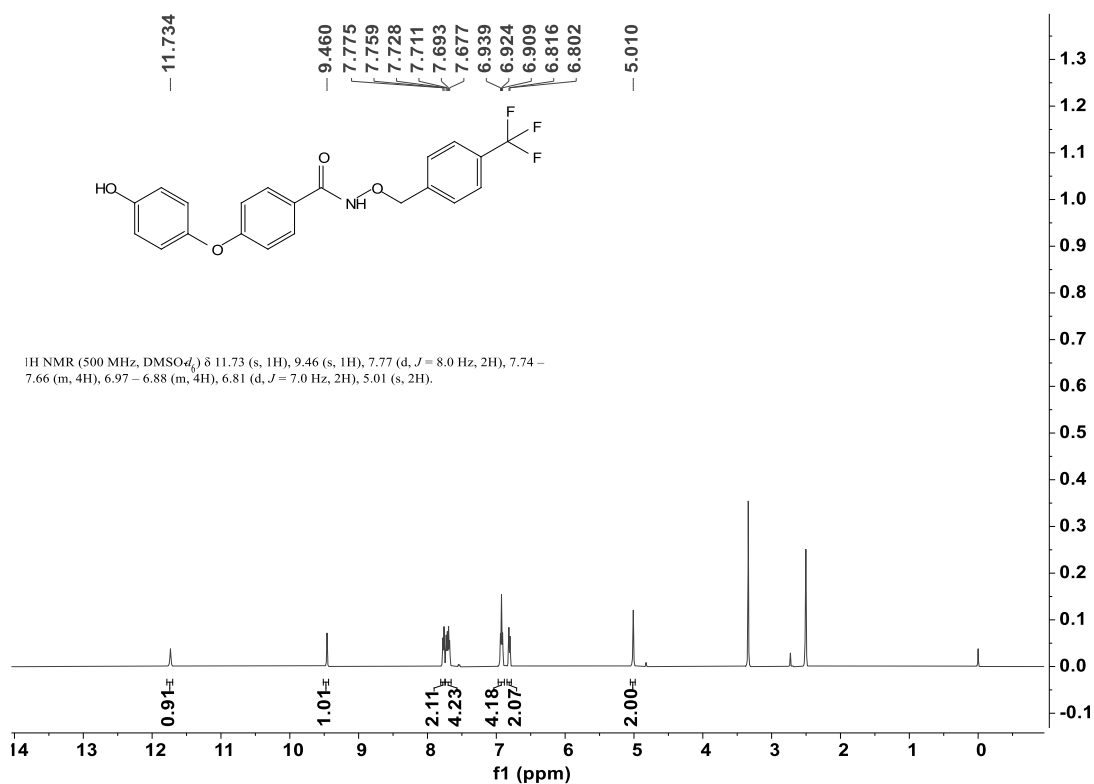

The <sup>1</sup>H NMR spectrogram of compound **M12**

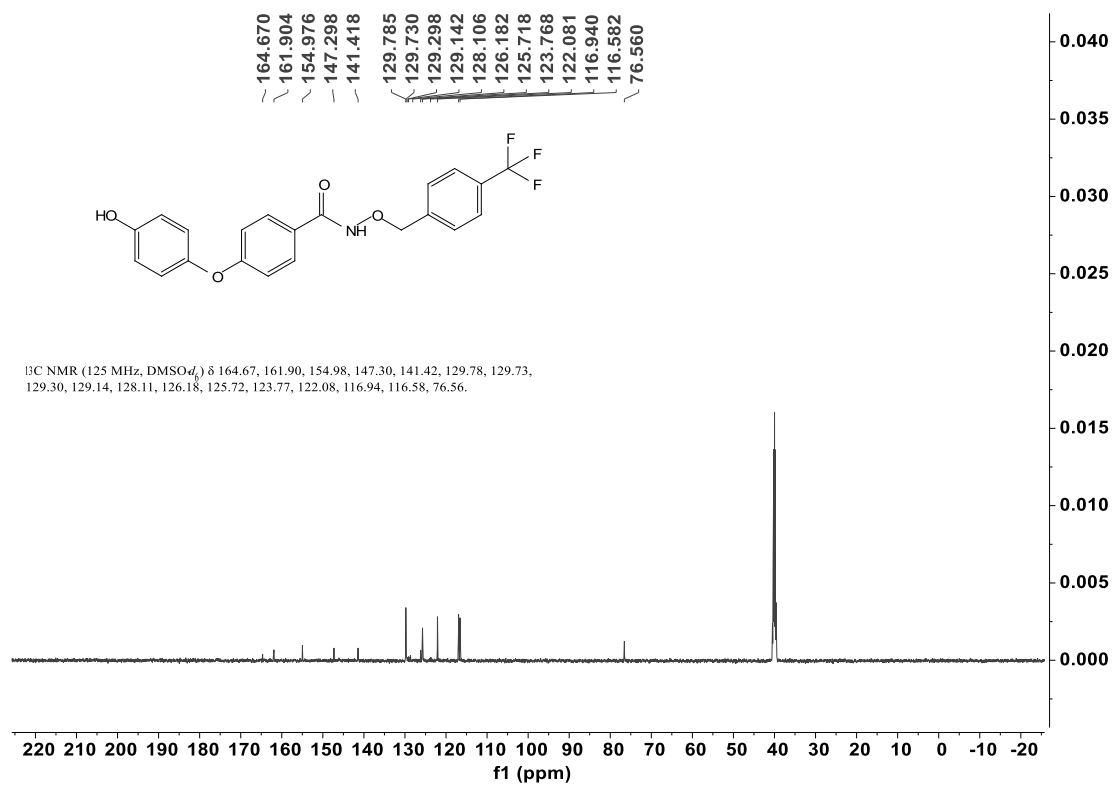

The <sup>13</sup>C NMR spectrogram of compound **M12**

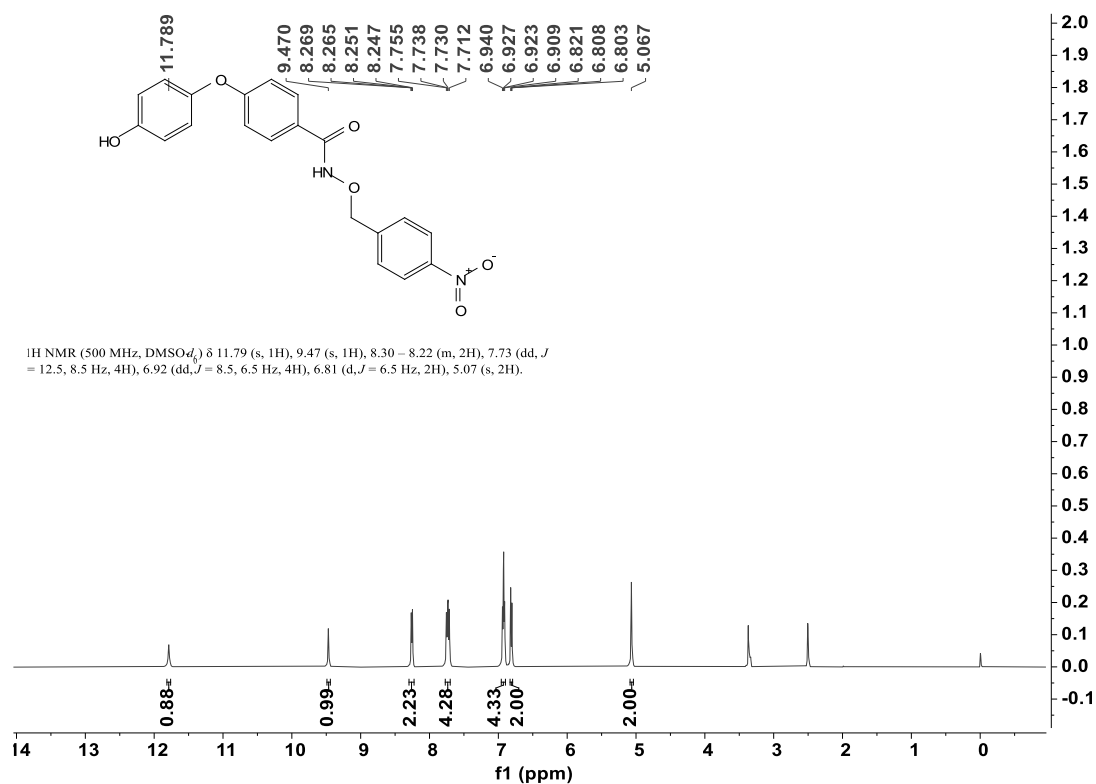

The <sup>1</sup>H NMR spectrogram of compound **M13**

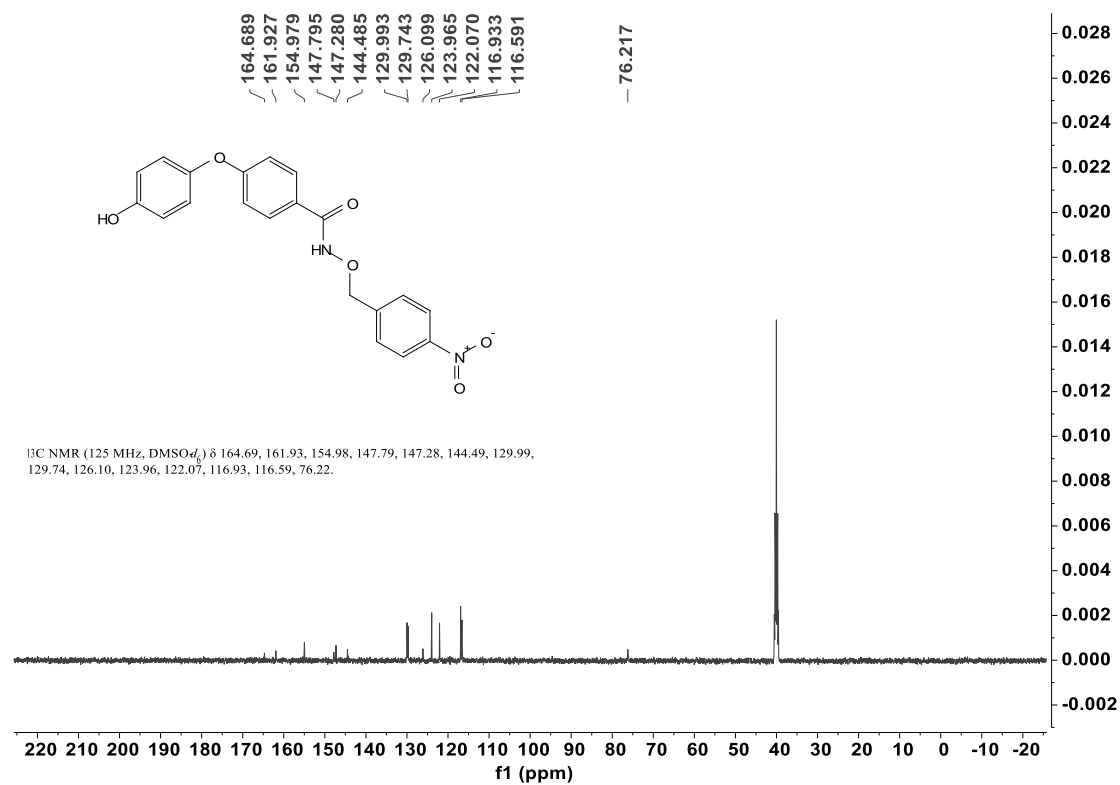

The <sup>13</sup>C NMR spectrogram of compound **M13**

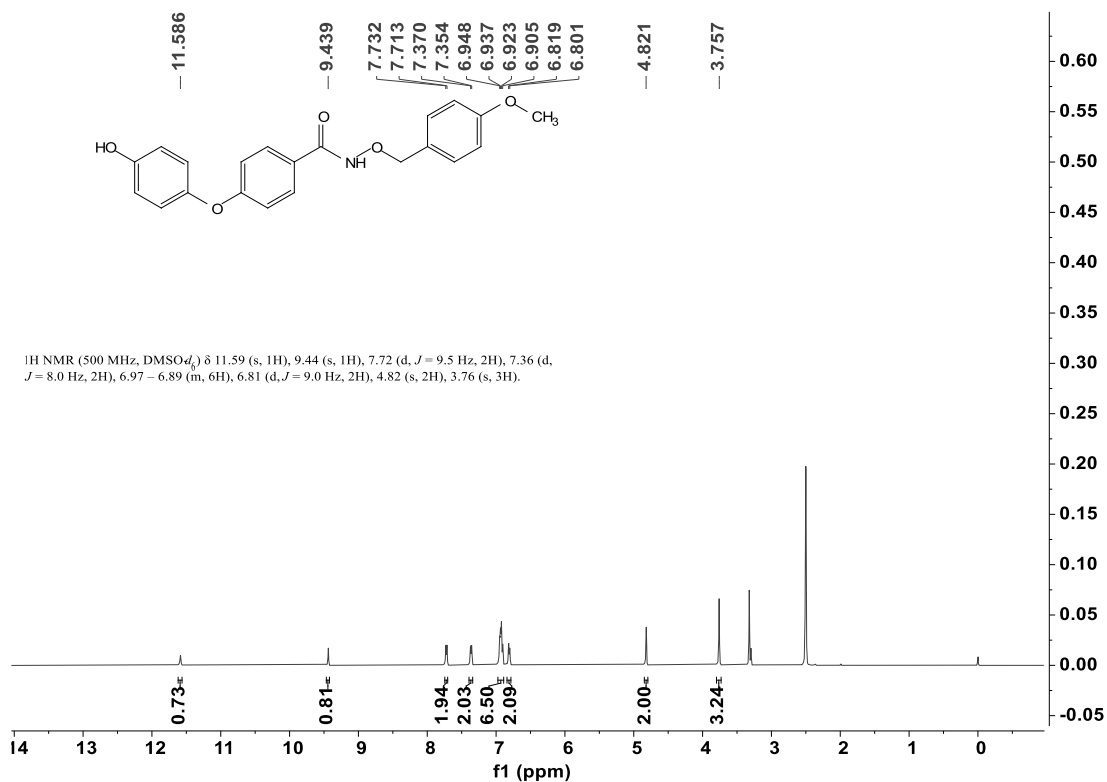

The <sup>1</sup>H NMR spectrogram of compound **M14**

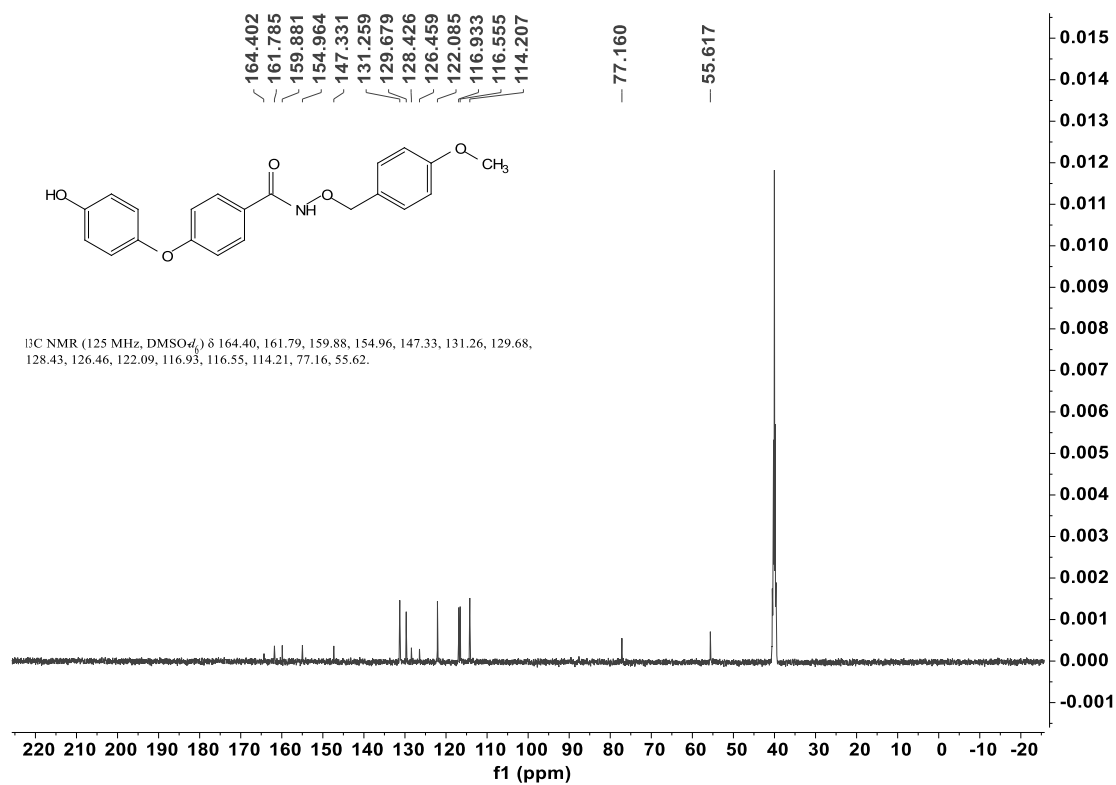

The <sup>13</sup>C NMR spectrogram of compound **M14**



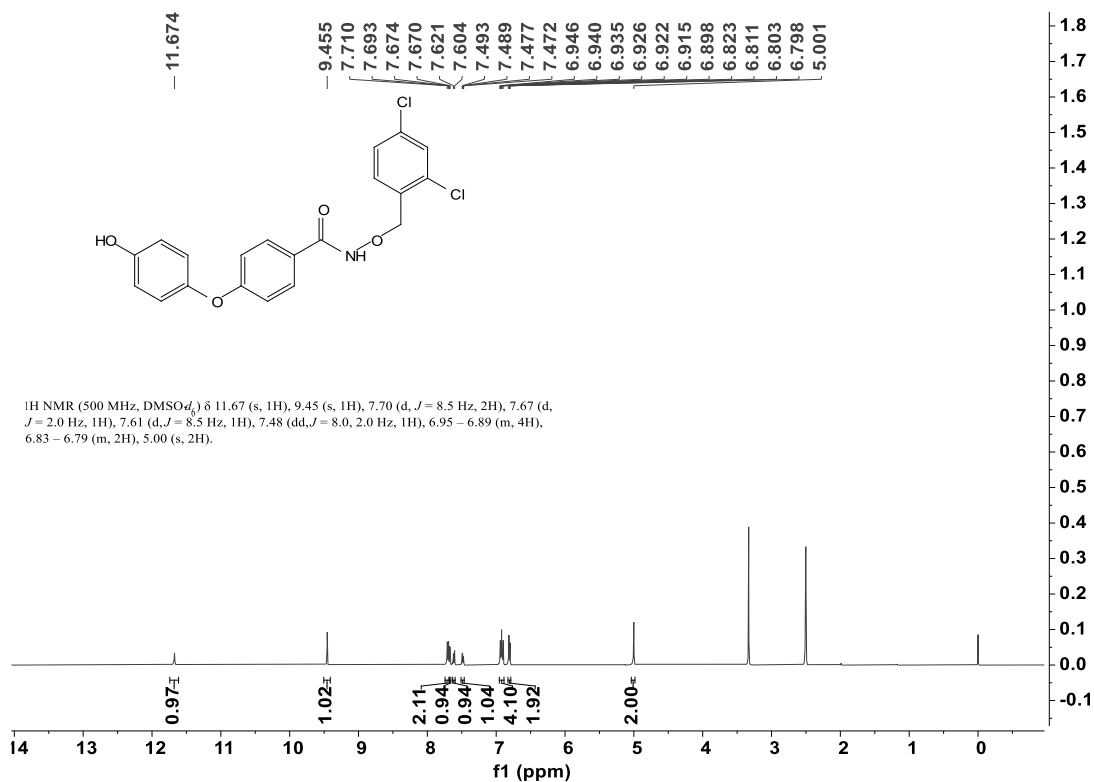

The <sup>1</sup>H NMR spectrogram of compound **M15**

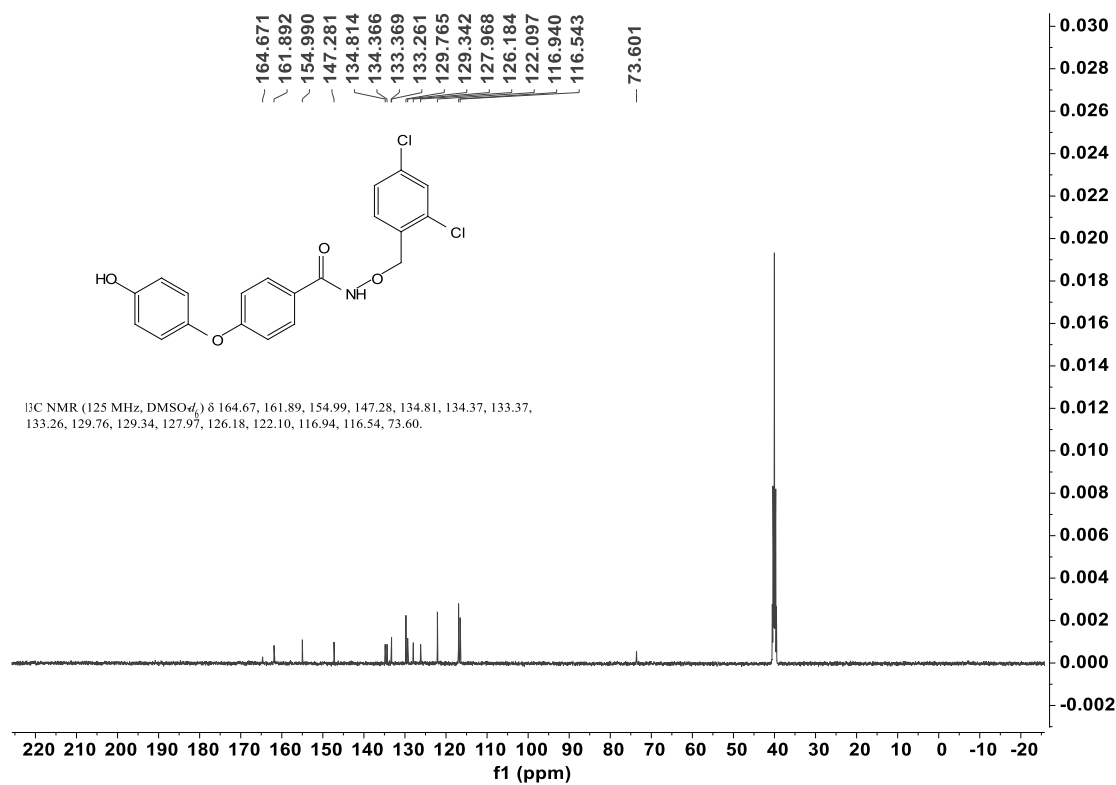

The <sup>13</sup>C NMR spectrogram of compound **M15**

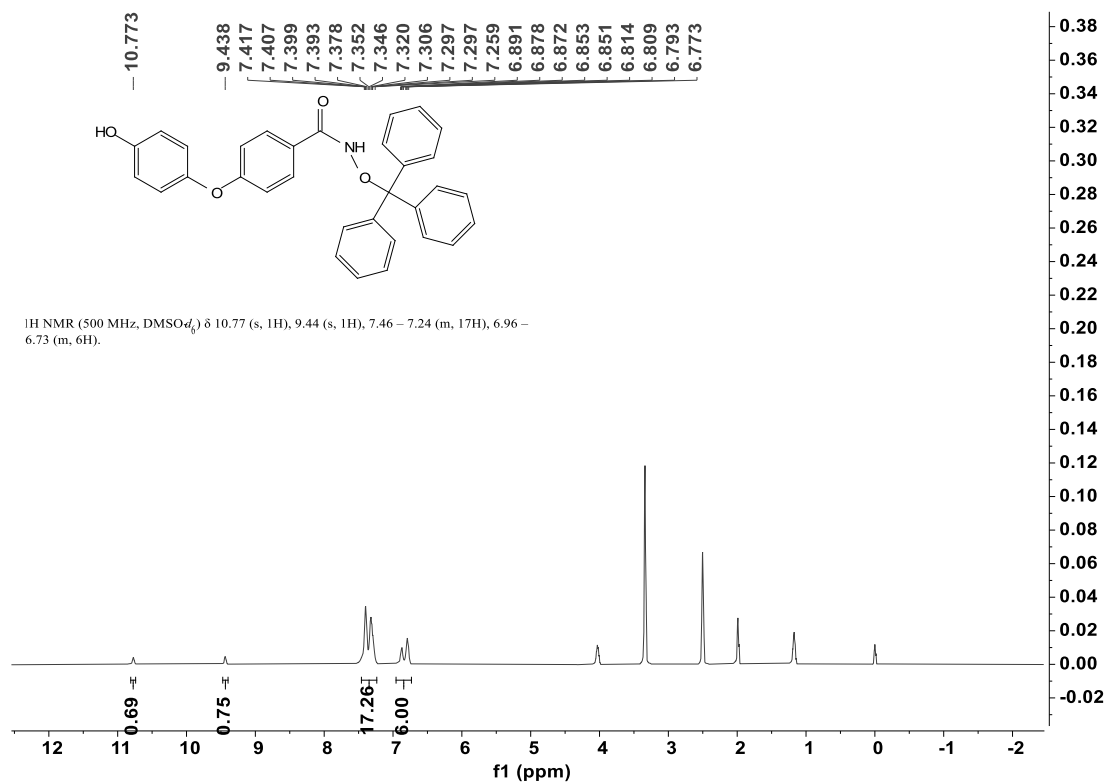

The  $^1\text{H}$  NMR spectrogram of compound **M16**

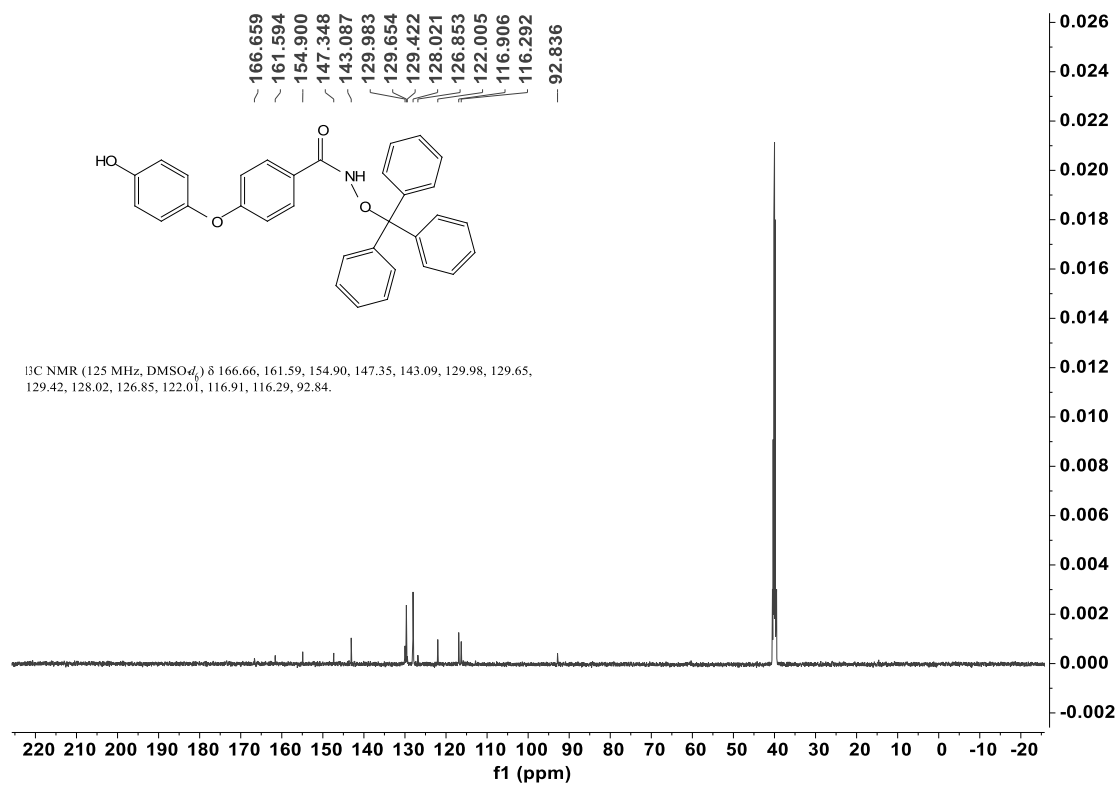

The  $^{13}\text{C}$  NMR spectrogram of compound **M16**

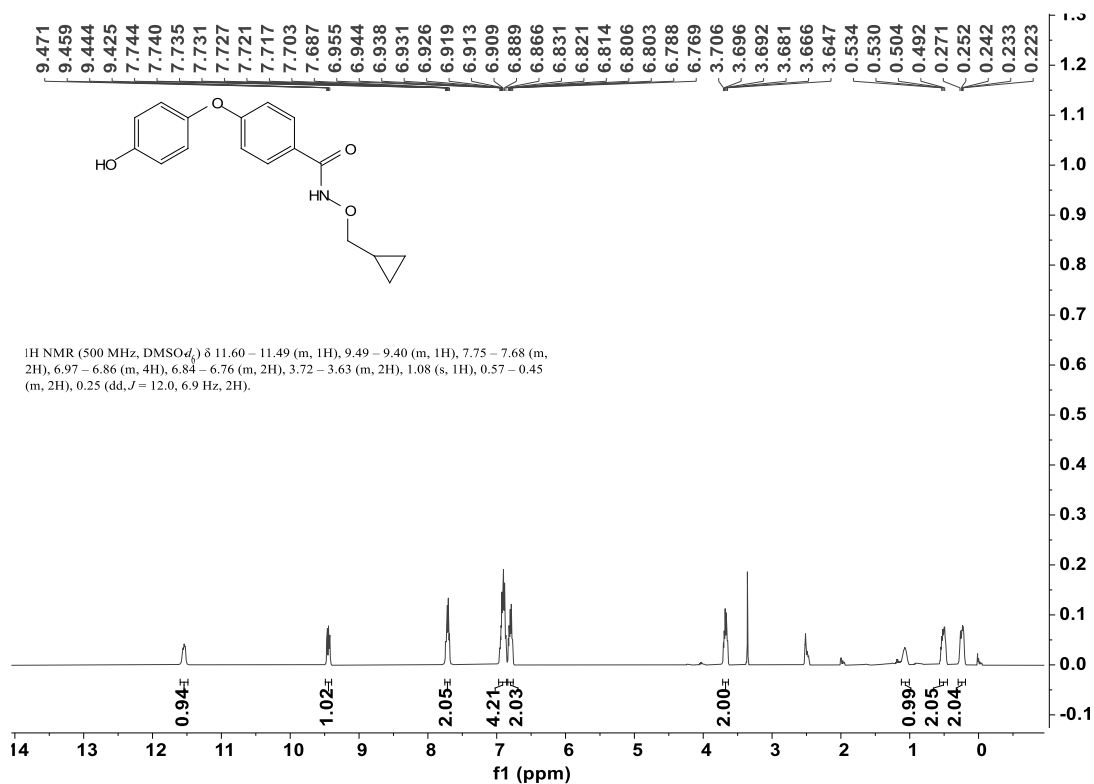

The <sup>1</sup>H NMR spectrogram of compound **M17**

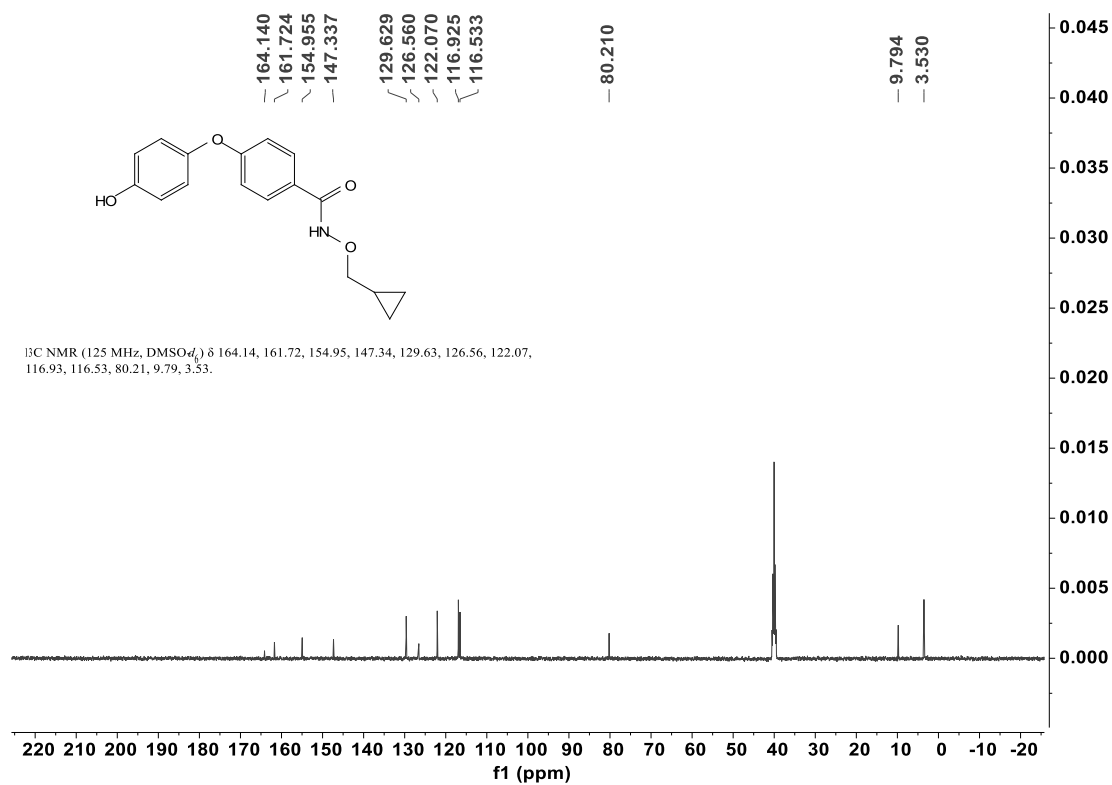

The <sup>13</sup>C NMR spectrogram of compound **M17**

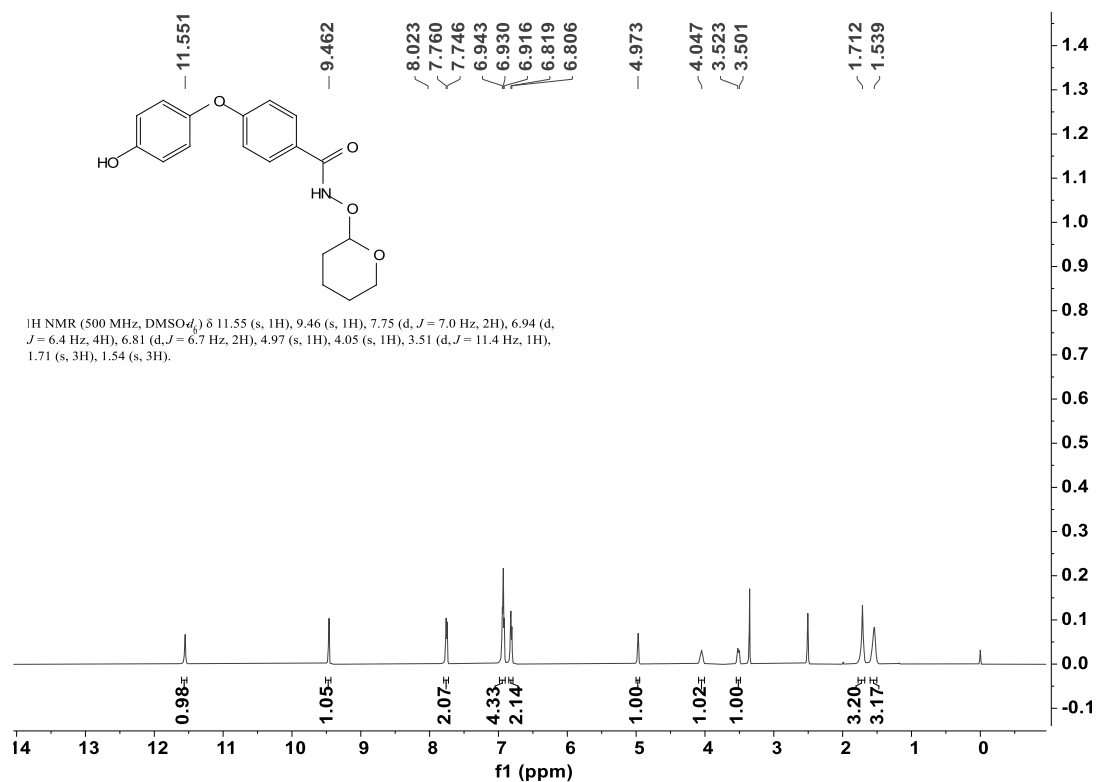

The <sup>1</sup>H NMR spectrogram of compound **M18**

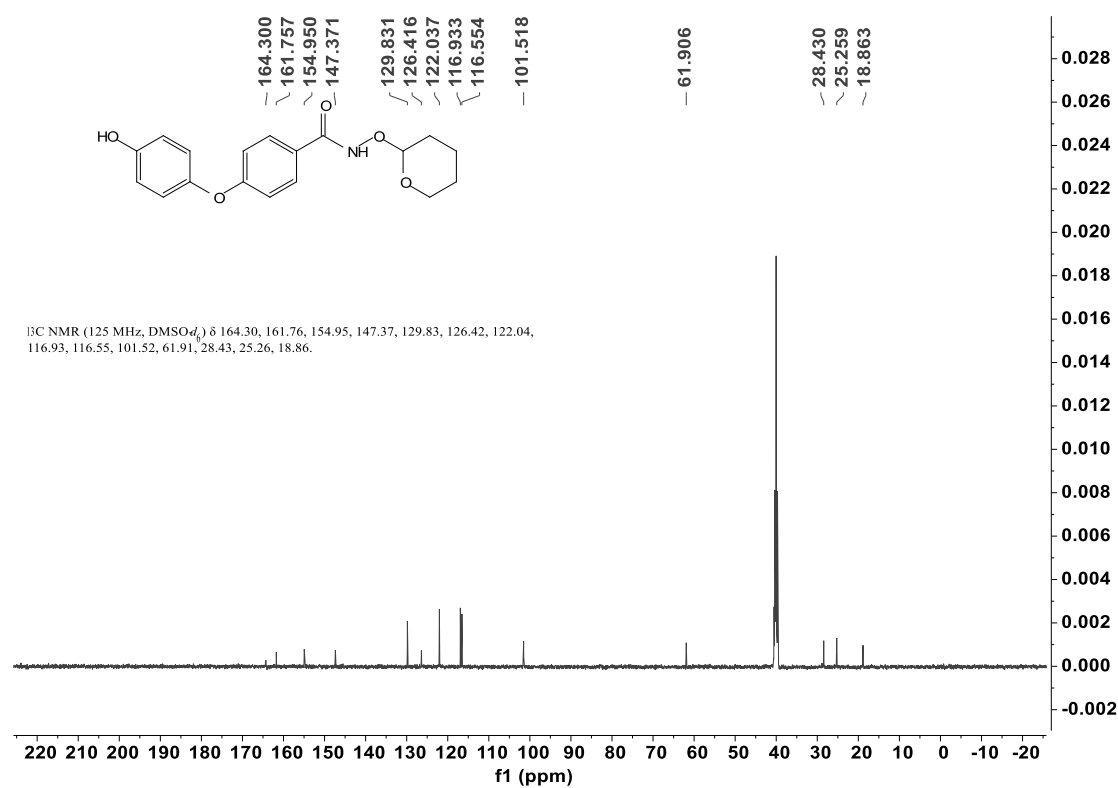

The <sup>13</sup>C NMR spectrogram of compound **M18**
